1 One gene, multiple ecological strategies: a biofilm regulator is a capacitor for sustainable  
2 diversity

3

4 Eisha Mhatre<sup>1,2</sup>, Daniel J. Snyder<sup>1,2</sup>, Emily Sileo<sup>1</sup>, Caroline B. Turner<sup>1,2</sup>, Sean W. Buskirk<sup>5</sup>,  
5 Nico L. Fernandez<sup>3</sup>, Matthew B. Neiditch<sup>4</sup>, Christopher M. Waters<sup>3</sup>, Vaughn S. Cooper<sup>1,2\*</sup>

6

7 Affiliations

8 <sup>1</sup>Department of Microbiology and Molecular Genetics, University of Pittsburgh, Pittsburgh,  
9 PA, 15219, USA.

10

11 <sup>2</sup>Center for Evolutionary Biology and Medicine

12

13 <sup>3</sup>Department of Microbiology and Molecular Genetics and the BEACON Center for the  
14 Study of Evolution in Action, Michigan State University, East Lansing, Michigan, 48824,  
15 USA.

16

17 <sup>4</sup> Department of Microbiology, Biochemistry, and Molecular Genetics, New Jersey  
18 Medical School, Rutgers, State University of New Jersey, Newark, New Jersey, USA

19 <sup>5</sup> Department of Biology, West Chester University of Pennsylvania, West Chester, PA,  
20 USA

21 \*corresponding author

22

23 Classification: Biological Sciences, Evolution, Microbiology

24

## 25 **Abstract**

26 Many bacteria cycle between sessile and motile forms in which they must sense and  
27 respond to internal and external signals to coordinate appropriate physiology. Maintaining  
28 fitness requires genetic networks that have been honed in variable environments to  
29 integrate these signals. The identity of the major regulators and how their control  
30 mechanisms evolved remain largely unknown in most organisms. During four different  
31 evolution experiments with the opportunist betaproteobacterium *Burkholderia*  
32 *cenocepacia* in a biofilm model, mutations were most frequently selected in the conserved  
33 gene *rpfR*. RpfR uniquely integrates two major signaling systems -- quorum sensing and  
34 the motile-sessile switch mediated by cyclic-d-GMP -- by two domains that sense,  
35 respond to, and control synthesis of the autoinducer cis-2-dodecenoic acid (BDSF). The  
36 BDSF response in turn regulates activity of diguanylate cyclase and phosphodiesterase  
37 domains acting on cyclic-di-GMP. Parallel adaptive substitutions evolved in each of these  
38 domains to produce unique life history strategies by regulating cyclic-di-GMP levels,  
39 global transcriptional responses, biofilm production, and polysaccharide composition.  
40 These phenotypes translated into distinct ecology and biofilm structures that enabled  
41 mutants to coexist and produce more biomass than expected from their constituents  
42 grown alone. This study shows that when bacterial populations are selected in  
43 environments challenging the limits of their plasticity, the evolved mutations not only alter  
44 genes at the nexus of signaling networks but also reveal the scope of their regulatory  
45 functions.

46

## 47 **Significance statement**

48 Many organisms including bacteria live in fluctuating environments requiring attachment  
49 and dispersal. These lifestyle decisions require multiple external signals to be processed  
50 by several genetic pathways, but how they are integrated is largely unknown. We  
51 conducted multiple evolution experiments totaling >20,000 generations with *Burkholderia*  
52 *cenocepacia* populations grown in a model of the biofilm life cycle and identified parallel  
53 mutations in one gene, *rpfR*, that is a conserved central regulator. Because RpfR has  
54 multiple sensor and catalytic domains, different mutations can produce different

55 ecological strategies that can coexist and even increase net growth. This study  
56 demonstrates that a single gene may coordinate complex life histories in biofilm-dwelling  
57 bacteria and that selection in defined environments can reshape niche breadth by single  
58 mutations.

59

60

## 61 Introduction

62 Bacteria have experienced strong selection over billions of generations to efficiently and  
63 reversibly switch from free-swimming to surface-bound life. The record of this selection is  
64 etched in the genomes of thousands of species, many of which have tens or even  
65 hundreds of genes that govern this lifestyle switch (1). At the nexus of this switch in the  
66 majority of bacteria is the second messenger molecule cyclic diguanylate monophosphate  
67 (c-di-GMP). Many genes synthesize, degrade, or directly bind and respond to c-di-GMP  
68 that in high concentrations promotes a sessile lifestyle and biofilm production and in low  
69 concentrations promotes a solitary, motile life. Those genomes with the greatest apparent  
70 redundancy in this signaling network demonstrate the highest plasticity along this motile-  
71 sessile axis (2). For instance, in *Vibrio cholerae*, there are 41 distinct diguanylate cyclases  
72 (DGCs) that synthesize c-di-GMP and 31 different phosphodiesterases (PDEs) that  
73 degrade this molecule (1).

74  
75 Recent theory and experiments suggest that the evolution of this apparent redundancy is  
76 driven by the need to integrate many signal inputs generated in fluctuating environments  
77 and also produce appropriate outputs in response (3). However, the question remains  
78 how so many enzymes that produce or degrade c-di-GMP can be maintained with distinct  
79 roles. One explanation is that some DGCs or PDEs exert a dominant effect in certain  
80 environmental conditions over the rest of the network. A screen of a complete set of gene  
81 knockouts in a low-temperature environment found that only six DGCs were primary  
82 contributors to increased levels of c-di-GMP in *V. cholerae* (4, 5). Similar approaches in  
83 *Pseudomonas*, which generally contain 40 or more genes encoding DGC, PDE, or both  
84 domains, suggest that these enzymes form complexes that are tailored to the prevailing  
85 sensed condition (6, 7). An active frontier in this field now seeks to define and characterize  
86 the external cues that activate these specific regulatory circuits, that is, how does the  
87 single second messenger c-di-GMP function as the decisive node for variable bacterial  
88 life-history strategies based on cues originating outside the cell?

89



90 Both of these questions – what gene products dominate in c-di-GMP signaling, and how  
91 do they integrate external signals – motivate this study of evolved populations of *B.*  
92 *cenoecepacia*, an opportunistic and metabolically versatile betaproteobacterium that is  
93 especially threatening to persons with cystic fibrosis (8). Evidence is mounting that a few  
94 of the 25 potential DGCs or PDEs in *B. cenoecepacia* are central to this network (9). An  
95 early mutant screen of *B. cenoecepacia* genes identified one gene, *yciR*, as one of several  
96 that increased biofilm production (10). This gene was later renamed *rpfR* (regulator of  
97 pathogenicity factors) based on its homolog in *Xanthomonas campestris* and was shown  
98 to have both DGC and PDE domains (11). Importantly, this study also identified a PAS  
99 sensor domain in RpfR that binds the autoinducer molecule cis-2-dodecenoic acid,  
100 otherwise known as *Burkholderia* diffusible signal factor (BDSF) (11). Most recently, a  
101 study of deletion mutants of all putative DGC and PDE proteins in *B. cenoecepacia* str.  
102 J2135 pointed to *rpfR* as being of particular importance (9). RpfR is now recognized as a  
103 bifunctional protein consisting of both DGC and PDE domains as well as two sensor  
104 domains, the second of which we recently discovered (12). One sensor is a Per-Arnt-Sim  
105 (PAS) domain that binds BDSF (11) which then stimulates the PDE domain that cleaves  
106 c-di-GMP to pGpG and GMP (Fig. 1A). Thus, BDSF, like other DSFs, promotes biofilm  
107 dispersal by decreasing cellular c-di-GMP levels.

108

109 Discovery of the second sensory domain was partly informed by our evolution  
110 experiments with *B. cenoecepacia* in our biofilm bead model, in which bacteria are selected  
111 to colonize a polystyrene bead that is transferred each day to a new test tube containing  
112 media and a fresh bead (13). Evolved *rpfR* mutants from these studies led us to identify  
113 an additional N-terminal domain of this protein that was previously uncharacterized in the  
114 protein database (12). We named this domain the RpfF-Inhibitory domain, or FI domain,  
115 because it binds RpfF, the thioesterase that produces BDSF that is encoded by the  
116 adjacent gene. When RpfR-FI binds RpfF it negatively regulates its production of BDSF  
117 (Fig. 1A) (12). This finding led us to hypothesize that *rpfR* was a focus of selection not  
118 only because it governs c-di-GMP-mediated biological processes but also BDSF-related  
119 quorum sensing (11, 14).

120

121 This integration of multiple regulatory roles within one gene raises an important  
122 evolutionary question: how does natural selection coordinate the functions of its protein  
123 domains given their biochemical opposition (synthesize or degrade c-di-GMP) and their  
124 capacity to produce different life histories (stick or swim)? Addressing this question is  
125 experimentally intractable by conventional methods using knockout or deletion mutations  
126 because they usually obscure effects of individual protein domains and cannot address  
127 how altered residues of a broadly conserved gene like *rpfR* influence specific function  
128 (15, 16). The point mutations in different RpfR domains that evolved during our long-term  
129 evolution experiment encode more nuanced information. Not only did these mutants  
130 increase fitness in a model of the biofilm lifestyle, they also coexisted for hundreds of  
131 generations, suggesting they produced different phenotypes that did not compete for the  
132 same niche (17, 18). Further, in a separate study we discovered a *rpfR* mutation that  
133 associated with increased biofilm production and genetic diversification during a 20-year  
134 chronic *B. multivorans* infection of a cystic fibrosis patient (19). In both scenarios, the *rpfR*  
135 mutations cooccurred with other mutations along their evolutionary trajectories, leaving  
136 their independent contributions to fitness and gene function yet to be determined. Here,  
137 we use a combination of directed genetics, transcriptomics, and assays of microbial  
138 ecology, physiology, and fitness in multiple environments to understand how *rpfR*  
139 functions as a regulatory node and why mutations in this system predictably evolve in our  
140 biofilm model and perhaps also during infections.

141

## 142 **Results**

### 143 **Unprecedented parallel selection for *rpfR* mutations during evolution experiments**

144 From previous evolution experiments (13, 17, 20, 21) with *B. cenocepacia* grown in our  
145 bead model that simulates the biofilm life cycle, we identified at least 72 *rpfR* mutations  
146 in 32 independent populations that affected multiple protein domains (Fig. 1B and Table  
147 S1). Mutations in *rpfR* were always among the first mutations to rise to high frequency  
148 (>25%) in each experiment and were associated with increased competitive fitness and  
149 biofilm production (17, 18). The mutation spectrum demonstrates strong selection for

150 altered or eliminated protein function: 45/46 nucleotide substitutions were  
151 nonsynonymous and 26 were deletion mutations or premature stop codons. All but two  
152 deletions removed both *rpfR* and the adjacent *rpfF* gene, suggesting that selection acted  
153 upon interactions between these two gene products. The distribution of SNPs was also  
154 non-random and significantly enriched in linker regions between the four domains rather  
155 than in the catalytic or sensory sites themselves ( $X^2 = 10.47$ ,  $df=1$ ,  $p = 0.0012$ , Table 1  
156 and Fig. 1B). This result suggests selection for altered interactions between functional  
157 domains rather than for disrupting BDSF sensing or c-di-GMP catalysis. Among the 13  
158 mutations in the DGC domain, 8 occurred at Y355 or R377, pointing to the functional  
159 importance of these residues. Further, 10 mutations affecting the phosphodiesterase EAL  
160 domain occurred in just two positions, S570 (3) and F589 (7). In total, selection acted on  
161 the *rpfR* sequence with remarkable precision that prompted further study of their  
162 functional roles.

163

164 In the long-term evolution experiment, three *rpfR* mutants arose in the same population,  
165 coexisted during long-term biofilm selection, and associated with different ecology, which  
166 suggested that these mutations were not functionally equivalent (13). These mutants,  
167 A106P in the region linking the FI and PAS domains, Y355D in the DGC domain, and a  
168 deletion mutant of both *rpfR* and *rpfF* (or a functionally equivalent *de novo* evolved  
169 mutant) also evolved in parallel among replicate populations and became a major focus  
170 of this study. Together, these findings suggested that selection could produce multiple,  
171 discrete phenotypes by altering different domains of a dominant c-di-GMP regulator.

172

### 173 **Biofilm and c-di-GMP levels vary with mutated *rpfR* domains**

174 We introduced the evolved point mutations or targeted deletions into the ancestral HI2424  
175 strain (Table S2 and S3) and confirmed that they were otherwise isogenic by whole-  
176 genome sequencing. Hereafter, we refer to these engineered genotypes as evolved  
177 mutants. Further, to test the contributions of each sensor and enzymatic domain, we  
178 constructed deletions of the FI domain (1-95aa) and alanine replacements predicted to  
179 eliminate diguanylate cyclase activity (GGDAF, equivalent to E319A), or

180 phosphodiesterase activity (AAL or E443A). We also deleted *rpfR* in its entirety, the  
181 adjacent BDSF synthase *rpfF*, or both these genes. Because a 95-gene deletion  
182 removing both *rpfR* and *rpfF* repeatedly evolved during our experiments and was  
183 available before successful construction of the  $\Delta rpfFR$  genotype, some experiments were  
184 conducted with this  $\Delta rpfRF+93$  genotype (Table S2). We subsequently competed these  
185 two genotypes and found their fitness to be statistically indistinguishable ( $t = 0.38$ ,  $df =$   
186  $10$ ,  $p = 0.12$ , Supplementary Data).

187

188 A handy screen for elevated c-di-GMP is rugose colony morphology or increased uptake  
189 of Congo Red dye, both of which result from the increased polysaccharide production  
190 often associated with high c-di-GMP (22). The evolved point mutants (A106P and Y355D)  
191 displayed increased uptake of Congo Red dye on morphology plates (Fig 2A) and all  
192 evolved colonies produced a characteristic studded center and smooth periphery in  
193 contrast with the smooth phenotype of WT (Fig. S1A). These colony phenotypes  
194 correlated with increased biofilm production and reduced motility (Fig. 2B and S1B).  
195 Similar phenotypes were observed in the engineered AAL and  $\Delta rpfF$  mutants (Fig. S1),  
196 which should eliminate the PDE domain activity and BDSF production that activates the  
197 PDE domain, respectively, increasing c-di-GMP levels. To test these predictions, we  
198 quantified *in vivo* levels of intracellular c-di-GMP at both 12 and 24h from planktonic and  
199 biofilm cultures of each mutant (Fig. 2CD and Table S4). First, we learned that absolute  
200 values of the signal were generally greater at 24h in denser biofilms, but relative  
201 differences (values divided by WT value) were greater at 12h when colonization of the  
202 plastic beads accelerates in our model (17, 23). Second, the A106P mutant of the FI-PAS  
203 linker region produces modest but consistent increases in c-di-GMP across conditions,  
204 suggesting this mutant interferes with PAS-mediated activation of the PDE. Third, as  
205 predicted, the AAL mutant that should disable the PDE domain and the  $\Delta rpfF$  mutant that  
206 produces no BDSF to activate the PDE domain both increases c-di-GMP. Fourth, the  
207 evolved  $\Delta rpfRF+93$  mutant produced elevated c-di-GMP in biofilms at 12 h and in  
208 planktonic cultures at 24h, which suggests that losing the PDE activity of RpfR unmask  
209 contributions of other DGCs. Interestingly, deleting only *rpfR* did not significantly alter c-

210 di-GMP levels in biofilms but did increase levels in planktonic cultures, suggesting that  
211 functional RpfF in the absence of RpfR affects the c-di-GMP pool in an unknown manner.  
212 Finally, the evolved Y355D mutant of the DGC domain produced the highest levels of c-  
213 di-GMP, suggesting this is a gain-of-function mutation in a domain thought to be  
214 nonfunctional (24, 25). To test this prediction, we constructed a GGDAF mutation that  
215 should disable the DGC domain in the Y355D mutant (Y355D-GGDAF) and found, as  
216 expected, it produced WT levels of c-di-GMP (Fig. S2A). This result demonstrated that  
217 the RpfR DGC domain is directly responsible for the high c-di-GMP levels in Y355D.  
218 Together, these results indicate that evolved genotypes produce different basal levels of  
219 c-di-GMP depending on the affected domain and alter production depending on their  
220 environment. In broader terms, growth of *B. cenocepacia* in biofilms can select for  
221 differentiated biofilm-associated phenotypes caused by single *rpfR* mutations.

222

### 223 **Fitness in the biofilm model relates to c-di-GMP levels**

224 We predicted that varied c-di-GMP levels and associated differences in biofilm matrix  
225 production contributed to fitness. Evolved and engineered mutants were competed  
226 against the WT strain in equal ratios and demonstrated significant variation in fitness, with  
227 the Y355D mutant the most fit (Fig. 3). Overall, fitness in the biofilm model at 24h, when  
228 development matures, positively correlated with c-di-GMP levels at 12h, when rates of  
229 attachment accelerate (Fig. 3A). However, the rate of fitness increases decelerate with  
230 increasing c-di-GMP levels, especially among evolved mutants, suggesting diminishing  
231 returns (Figure 3A). The A106P mutant was disproportionately more fit at 24h, implying  
232 additional advantages of this genotype affecting the FI-PAS linker region, yet fitness of  
233  $\Delta rpfF$  was equivalent to WT in biofilm despite very high c-di-GMP levels (Fig. 3B). Further,  
234 the evolved  $\Delta rpfRF+93$  and the engineered  $\Delta rpfR$  genotypes were more fit against WT  
235 despite modest increases in c-di-GMP. Many of the mutants were also more fit against  
236 the WT under planktonic growth conditions, which is a necessary component of our bead  
237 model that requires dispersal, but fitness benefits were lower and less variable among  
238 mutants than those in biofilm conditions (Fig. S3). The loss of PDE activity (AAL)  
239 increased c-di-GMP levels, as predicted, and also greatly increased fitness (Fig. 3AB).

240 This strong benefit suggests that the dominant role of RpfR is its PDE activity, as has  
241 been shown in orthologs of other species (3, 26)

242

### 243 **Biofilm ecology: (i) coexistence of *rpfR* mutants**

244 The sustained coexistence of different *rpfR* mutants in evolving biofilm populations (18)  
245 could be explained by niche differentiation within the biofilm life cycle. If these niches  
246 support populations of different sizes, the fitness of different genotypes should depend  
247 on their relative frequencies and be able to invade one another when rare, also known as  
248 negative-frequency-dependent selection (NFDS) (27). We tested this hypothesis by  
249 competing each evolved genotype versus the others after 24 hours in the biofilm and  
250 found support for this model (Fig. 3C). Both A106P and Y355D can invade one another  
251 when introduced at low frequency, with a predicted equilibrium frequency of 1:4 A106P:  
252 Y355D (Fig. 3C, linear regression analysis  $y = -0.0149x + 0.3599$ ,  $r^2 = 0.9883$ ). Further,  
253 the A106P and  $\Delta rpfRF+93$  or  $\Delta rpfR$  mutants show comparable high fitness in competition  
254 with WT (Fig. 2A) but may coexist via NFDS when co-cultured (Fig. 3C, linear regression  
255  $y = -0.01164x + 0.8477$ ,  $r^2 = 0.9406$  and Supplementary fig. 4B,  $y = -0.02265x + 0.945$ ,  
256  $r^2 = 0.6421$ ). However, the Y355D mutant was significantly more fit than the  $\Delta rpfRF+93$   
257 genotype that ultimately displaced it during the long-term evolution experiment (Fig. 3C  
258 yellow, linear regression  $y = -0.0029x + 1.074$ ,  $r^2 = 0.0336$ ). High Y355D fitness is  
259 consistent with its sweep to high frequency (13) and parallel evolution (Table 1), but this  
260 cannot explain why  $\Delta rpfRF+93$  ultimately displaced Y355D. Prior studies indicated that  
261 the spread of other mutations within the  $\Delta rpfRF+93$  lineage increased its relative fitness  
262 and excluded other *rpfR* lineages (18), and we explore other explanations below. In  
263 contrast,  $\Delta rpfF$  and WT fail to invade each other when rare (Fig. S4A), which is consistent  
264 with complementation by BDSF produced by the WT competitor that activates the PDE  
265 in the deletion mutant. In summary, different *rpfR* genotypes that avoid BDSF-mediated  
266 dispersion in various ways readily displace the WT ancestor in our biofilm model and can  
267 coexist for hundreds of generations by NFDS.

268

### 269 **Biofilm ecology: (ii) co-aggregation and synergistic interactions**



270 Sustained coexistence of different genotypes in biofilms could be enabled by forming  
271 aggregates of different composition and form. We tested this potential mechanism of  
272 niche differentiation using fluorescently labeled genotypes to measure their co-  
273 localization and total volume by confocal microscopy (Table S5). When cultured  
274 separately, both A106P and Y355D formed large, thick aggregates that were well  
275 dispersed (Fig. 4A), whereas  $\Delta rpfRF+93$  produced thinner, more uniform biofilms  
276 arranged in small clusters. This result shows that the loss of the RpfRF complex and/or  
277 BDSF production alters the form of biofilm development, whereas the point mutants  
278 appear to produce larger clusters than those produced by WT (Fig. 4AB, Table S5 and  
279 Fig. S4A). Different genotype combinations produced aggregates of varying size and  
280 biofilm thickness (Fig. 4B). The difference in biofilm development by  $\Delta rpfRF+93$  was even  
281 more apparent when this mutant was co-cultured with either Y355D or A106P, resulting  
282 in thinner, more uniform structures and indicating a dominant effect of  $\Delta rpfRF+93$  on  
283 biofilm development (Fig. 4AB and Table S5). Incidentally, we observed that  $\Delta rpfF$  and  
284  $\Delta rpfR$  formed small clusters when mixed with other mutants, but formed larger  
285 aggregates when grown together, which is consistent with cross-complementation (Fig.  
286 S4A).

287  
288 Interactions between genotypes can range from antagonistic, which would reduce net  
289 productivity of both types, to synergistic, which would increase productivity of both. We  
290 measured productivity as attached CFU/ml and microscopic biovolume for all genotype  
291 combinations. In most cases, co-cultures of evolved *rpfR* mutants grown on polystyrene  
292 beads were significantly more productive than mutants grown alone (Fig. 4C and Table  
293 S5). This indicates that different *rpfR* genotypes facilitate attachment and growth of one  
294 other, which supports conclusions from prior studies of long-term evolved biofilm  
295 populations (18). Notably, the biofilm productivity of co-cultures of Y355D and A106P is  
296 higher than that of the individual genotypes but is lower than either co-cultured with  
297  $\Delta rpfRF+93$ , with increased coaggregation with both point mutants (Pearson coefficient  
298  $>0.5$ ) (Fig. 4CD, Table S5). These results demonstrate that mixtures of *rpfR* mutants that  
299 vary in c-di-GMP levels and BDSF signaling capacity are more productive than when

300 grown alone and produce more uniform biofilm structures together. We speculate that the  
301 increased evenness of the mixed biofilm architecture may be an adaptation to maintain  
302 attachment to the polystyrene beads, which collide frequently in the test tubes.

303

### 304 **Biofilm ecology: (iii) Polysaccharide composition**

305 *B. cenocepacia* encodes the capacity to produce various polysaccharides. The best  
306 known of these is cepacian (composed of rhamnose, mannose, glucose, galactose and  
307 glucuronic acid) (28) but others include Bep (*Burkholderia* extracellular polysaccharide)  
308 and galactan-KDO (29–31). We hypothesized that the different binding and aggregation  
309 properties of *rpfR* mutants related to production of the components in these  
310 exopolysaccharides of varied composition. We used fluorescein-tagged lectins that bind  
311 different sugars to visualize and quantify differences in the EPS composition of evolved  
312 mutants (32). All genotypes including WT produced a matrix composed of mannose, and  
313 this sugar was particularly elevated in the  $\Delta rpfRF+93$  genotype. However, fucose was  
314 only detected in *rpfR* mutants, and not  $\Delta rpfF$  (Fig. 5B). Galactose, N-acetyl glucosamine  
315 and N-acetyl galactosamine were not detected in the EPS produced by any genotype  
316 (data not shown). We then used calcofluor white to stain cellulose and found that Y355D  
317 produces much more cellulose than any other mutant (Fig. 5C and Fig. S5). Thus, the  
318 varied biofilm phenotypes of *rpfR* mutants may result from secreting different polymers  
319 that could serve as shared products that benefit collective attachment.

320

### 321 **Transcriptomic differences among *rpfR* mutants**

322 Mutations in *rpfR* are clearly pleiotropic so to examine the extent of their altered regulation  
323 we conducted RNA-seq of six genotypes (A106P, Y355D,  $\Delta rpfR$ ,  $\Delta rpfF$ ,  $\Delta rpfRF$ , and WT)  
324 grown under selective biofilm conditions. Hundreds of genes distinguished mutant  
325 expression from WT (at q values < 0.05), with Y355D recording the greatest number (~  
326 930 genes at Fold change < 1.5) and dozens of genes separated mutants from one  
327 another (Fig. S7). As expected from the elevated c-di-GMP levels of mutants, motility and  
328 chemotaxis processes were downregulated (except not in  $\Delta rpfR$ , which also produced  
329 near-WT levels of c-di-GMP), and in the mutant with the highest c-di-GMP levels, Y355D,



330 other PDE's (e.g. Bcen2424\_5027) were upregulated (Fig. 6). One gene cluster encoding  
331 the synthesis of Bep exhibited the greatest increase in expression across all mutants,  
332 which provides strong evidence that this polymer is responsible for increased biofilm  
333 production. Further, the *berA* gene (Bcen2424\_4216), which binds c-di-GMP and  
334 activates Bep production and cellulose synthesis, was upregulated in all mutants but  
335  $\Delta rpfRF$  (29, 33). Notably, the genes within the Bep cluster show variable expression  
336 levels among mutants, with the most upregulated being the Bcen2424\_4206 gene (a  
337 *manC* homolog) that encodes mannose-1-phosphate guanylyltransferase. This enzyme  
338 plays dual roles, acting as a transferase to convert mannose-1-phosphate to GDP-  
339 mannose, a precursor for other sugar nucleotides such as GDP-fucose and GDP-  
340 rhamnose, and as an isomerase on mannose-6-phosphate to produce fructose-6-  
341 phosphate for gluconeogenesis (34). We hypothesize that increased expression of this  
342 gene may activate fucose synthesis (Figure 5) via the intermediate GDP mannose.  
343 Interestingly, both *berA* and *manC* show the highest fold-expression changes in Y355D,  
344 which could explain the high fucose and cellulose in the EPS of this mutant. Another  
345 upregulated gene in Y355D is predicted to encode Flp/Fap pilin (Bcen2424\_5868, Fig.  
346 S7), which is known to initiate surface attachment in many bacteria (35). These  
347 differences strongly suggest a genetic basis of functional differentiation among *rpfR*  
348 mutants via c-di-GMP-responsive transcription.

349  
350 The gene cluster most consistently downregulated among *rpfR/F* mutants encodes three  
351 fucose-binding lectins (36). These lectins reportedly have high affinity for galactose and  
352 fucose and bind carbohydrates in mucus or glycoconjugates at epithelial cell surfaces,  
353 which enables them to adhere specifically to host surfaces as single cells (37), but this  
354 form of attachment is unavailable in our laboratory system. This result also indicates that  
355 *rpfR/F* balances solitary lectin-based attachment against aggregate formation via  
356 polysaccharide synthesis. Another cluster that was downregulated among *rpfR/F* mutants  
357 putatively encodes fatty acid biosynthesis (Fig. 6). Overall, selection appears to have  
358 favored these *rpfR* mutants because of their global regulatory effects that produce a  
359 variety of phenotypes related to attachment and biofilm production, as well as dispersal

360 and reattachment. While many of them can be explained generally as classic outcomes  
361 of high c-di-GMP, mutants are also differentiated in their patterns of expression.  
362 Importantly, demonstrating the power of evolution as a forward genetic screen, the *rpfR*  
363 deletion produced the least number of expression changes (Fig. 6), this deletion did not  
364 evolve in our experiments, and this mutant was less beneficial than the evolved SNPs  
365 that changed but did not eliminate RpfR function.

366

## 367 **Discussion**

368 Many microbes living at surface-liquid interfaces undergo a cycle of attachment, biofilm  
369 assembly, dispersal, and reattachment, and thus experience chronic heterogeneity. At  
370 the start of these evolution experiments we anticipated diverse genotypes producing  
371 adaptations to subsets of these conditions (20, 38). However, much to our surprise,  
372 mutations in one gene were selected far more often than any other (13, 18–21). The  
373 evolution experiments summarized here collectively span >20,000 generations, yet  
374 mutations in only one of the 25 genes in the *B. cenocepacia* HI2424 genome with the  
375 DGC or PDE domains that synthesize or degrade c-di-GMP reached high frequency. This  
376 focused selection on *rpfR* and the remarkable parallelism at few residues (Fig. 1B)  
377 demonstrates that it is the central regulator that governs the switch to biofilm growth. More  
378 surprising, because *rpfR* mutations were often the first to reach high frequency in evolved  
379 populations, we can infer that only one gene of the predicted 6812 in the *B. cenocepacia*  
380 genome encodes the latent potential for the best adaptations in our laboratory biofilm  
381 system. This parallelism is at least partly a product of our strain choice and specific  
382 experimental conditions, but nonetheless, we expect that *rpfR* plays a similar central role  
383 in many other species, where this gene is very well conserved (>60% identical and >80%  
384 similar) across dozens of beta- and gamma-Proteobacteria genera and is often syntenic  
385 with *rpfF* (Supplemental Data) (12, 39). Our evolution experiments have identified a  
386 regulator at the core of c-di-GMP signaling and life history decision-making for numerous  
387 bacterial species including many of medical and agricultural significance.

388

389 **Diverse effects of evolved mutations extend the model of RpfR / RpfF regulation**

390 Findings of molecular parallelism in evolution experiments are becoming more common  
391 and can indicate the functional importance of certain residues. Here, we observed  
392 residue-level parallelism at Y355 and R377 in the DGC domain and S570 and F589 in  
393 the PDE domain, as well as disproportionate numbers of mutations in the linker regions  
394 that connect binding and catalytic domains of RpfR (Fig. 1B). Note that Y355 is 99%  
395 identical and R377 is 97% identical across homologs, providing evidence of their  
396 functional importance (Table S1). Together, these results demonstrate that selection  
397 increased biofilm-related fitness by altering the regulation of but not eliminating RpfR  
398 functions. We anticipate these residues are significant for understanding how RpfR, as  
399 the first reported c-di-GMP-regulator that is directly activated by a diffusible autoinducer,  
400 coordinates diverse responses (11).

401  
402 Contrary to an earlier report (40), we found that deleting *rpfR* did not cause a growth  
403 defect but rather increased fitness in our biofilm model and decreased motility (Fig. 2 and  
404 3). Likewise, deletion of the homolog *pdeR* (previously, *yciR*) in *E. coli* also reduces  
405 motility (24). We conclude that RpfR is mainly a PDE with constrained DGC activity, and  
406 we speculate that Y355 and R377 play an important role in a conformational change that  
407 either activates or inhibits RpfR DGC activity. Likewise, S570 and F589 are 100%  
408 identical across *rpfR* homologs and comprise a conserved “loop 6” domain that enables  
409 dimerization of the EAL domain and binding of c-di-GMP and the magnesium ion cofactor  
410 (41). This study of loop 6 showed that S570 in particular is essential for c-di-GMP binding  
411 for hydrolysis, so a point mutation at this site almost certainly enables maintenance of  
412 high c-di-GMP levels.

413  
414 We also found that RpfR interacts directly with RpfF, the enzyme that synthesizes BDSF,  
415 and that the RpfR-RpfF interaction inhibits BDSF synthesis (12). We hypothesized that  
416 BDSF, RpfR, and RpfF could form a feedback inhibition apparatus whereby BDSF binding  
417 to RpfR limits RpfF activity, i.e., BDSF production. Further, we predict that the RpfR-RpfF  
418 interaction is critical in the long term for these bacteria but dispensable in these short-  
419 term experiments. RpfF synthesizes BDSF by dehydrating 3-hydroxydodecanoyl-acyl

420 carrier protein (ACP) to form *cis*-2-dodecenoyl-ACP, and hydrolyzing the thioester bond  
421 linking the acyl-chain to ACP, releasing free BDSF (42). However, RpfF is promiscuous  
422 and can target other acyl-ACP substrates, hampering membrane lipid synthesis for  
423 example. Some bacteria like *Xanthomonas spp.* also produce antagonist proteins RpfB  
424 and RpfC to control RpfF activity (40), but *Burkholderia* lacks these proteins. Thus, the  
425 RpfR-FI domain is key to governing RpfF activity. This regulation is in addition to the  
426 interaction between BDSF and RpfR, which activates its PDE domain upon binding the  
427 PAS domain (11) (Fig.1).

428  
429 Building upon this model, we predict that the parallel A106P mutation in the linker region  
430 between the FI and PAS domains interferes with a conformational change that activates  
431 the PDE domain upon BDSF binding (Fig. 7). Mutants in this linker can be considered  
432 “signal-blind” and maintain basal DGC activity, which is consistent with the intermediate  
433 c-di-GMP and fitness effects of this mutant (Fig. 2 and 3). Another common mutation  
434 completely deleted *rpfR* and *rpfF* and 93 other genes, which eliminates both BDSF  
435 synthesis and RpfR-mediated regulation of c-di-GMP by its dominant PDE. This should  
436 lead to a net increase in biofilm production and biofilm-related fitness, which we observed,  
437 but also an inability to either produce or sense BDSF and thus a relative insensitivity to  
438 the functions of other genotypes. This predicted signal-blind and -mute function is  
439 consistent with the ability of this genotype to persist and ultimately invade the other  
440 mutants with the benefit over other mutations in the LTE (13), despite its lower initial  
441 fitness observed.

442  
443 Integrating these findings allows us to expand our mechanistic understanding of how this  
444 RpfF/R regulatory node governing c-di-GMP signaling and BDSF quorum sensing  
445 enables “decisions” within the biofilm life cycle (Fig. 7). Conditions that select for  
446 increased biofilm would favor deactivation of PDE activity either directly, by mutating  
447 S570 / F589, or indirectly, by limiting BDSF binding to activate the PDE (A106P) or by  
448 eliminating BDSF synthesis by RpfF ( $\Delta rpfF$ ). Alternatively, mutants like Y355D that  
449 activate the DGC would be selected (Fig. 7). We tested these predictions by making

450 targeted mutations of the functional domains of this system. First, in a prior study we  
451 engineered point mutations in the PAS domain at sites predicted to bind BDSF, and these  
452 produced elevated c-di-GMP and fitness because the PDE domain was not activated (12).  
453 Here, we also deleted the FI domain thought to control RpfF activity and, as expected,  
454 this mutant had low c-di-GMP and was deleterious under biofilm conditions (Fig. 2CD and  
455 3A). On the other hand, deleting *rpfF* greatly increased c-di-GMP, but curiously this  
456 single-gene deletion was not beneficial in competition with WT, perhaps because the WT  
457 complemented the BDSF defect of  $\Delta rpfF$  in cocultures, and consequently was never  
458 selected in our experiments (Fig. 3). This implies that the RpfR-F complex, perhaps also  
459 with other partners (9), has been preserved by selection as a functional unit and that  
460 disrupting only one component is disfavored. The Hengge laboratory has advanced the  
461 model that the RpfR ortholog in *E. coli*, PdeR, functions as a “trigger enzyme” at the hub  
462 of c-di-GMP signaling to control curli synthesis and other biofilm-related traits (43).  
463 Although *E. coli* does not encode RpfF, it is possible that the FI domain of PdeR and its  
464 orthologs in diverse species bind other proteins contributing to the trigger.

465

### 466 **Ecological diversification and complementary lifestyles are pre-wired within** 467 **RpfF/R**

468 In retrospect, perhaps we should not have been surprised that mutants of a multi-domain  
469 protein with both sensory and catalytic activities would have varied functions. What is  
470 remarkable is that different mutants can evolve and coexist in the same populations  
471 because of their distinct ecological consequences. For instance, the small aggregate  
472 phenotype of  $\Delta rpfRF+93$  allows growth between the large aggregates of its co-cultured  
473 partner, increases overall biofilm productivity, and maintains genetic diversity despite the  
474 dominant Y355D genotype (Fig. 4). These mixed biofilms consisting of genotypes  
475 producing large aggregates and small clusters appear to decrease competition and  
476 increase the carrying capacity of the environment, which is consistent with the character  
477 displacement process we described previously in a long-term evolution experiment (18,  
478 44). Overall, higher c-di-GMP levels correlated with more EPS production and larger  
479 aggregates, but new biofilm phenotypes emerged when evolved mutants were co-

480 cultured (Fig. 4), including reciprocal frequency-dependence (Fig 3). These positive  
481 interactions explain how three different *rpfR* mutants were maintained for hundreds of  
482 generations in the first long-term experiment (13).

483

484 The phenotypes encoded by this system contribute to the important differences in affinity  
485 for different surfaces and potential for pathogenesis. While the WT strain produces the  
486 potent BclACB lectins that bind fucose and mannose residues on host cells (Fig. 6) (45),  
487 the evolved mutants downregulate these lectins to upregulate EPS production, whose  
488 composition varied among mutants (Fig. 5). EPS synthesis is associated with  
489 upregulation of the *manC* gene, which is reported as a virulence factor in cystic fibrosis  
490 infections caused by the *Burkholderia cepacia* complex (46). Lectin synthesis is under  
491 control of quorum sensing molecules including BDSF (47), and also by the protein GtrR  
492 that binds to the *bclABC* promoter and induces their expression. RpfR enhances this  
493 expression by forming a complex with GtrR, but not when it binds c-di-GMP (14). It follows  
494 that the high c-di-GMP production of evolved *rpfR* mutants downregulated lectin  
495 production. However, these mutations encumber a tradeoff that limits other dimensions  
496 of the niche, like reduced motility and suppressed lectin-based attachment (Fig 5 and Fig.  
497 S1B and S5), and likely would not persist over the longer term in nature.

498

499 The *Burkholderia cepacia* complex is best known for causing opportunistic infections in  
500 the cystic fibrosis airway, where populations encounter a more restrictive subset of their  
501 original niche that selects for traits like aggregation regulated by *rpfRF* (19). Tracking  
502 evolving populations of species with *rpfRF*, either *in vitro* or *in vivo*, will provide valuable  
503 tests of the model presented here and determine whether *rpfRF* is a c-di-GMP signaling  
504 node in other species that could eventually be exploited for antimicrobial strategies or  
505 microbiome engineering.

506

## 507 **Experimental Procedures (to appear in SI)**

508 Bacterial growth media and conditions

509 Strains and plasmids used in the study are listed in Table S2. The frozen stocks were  
510 revived in Tryptone Soy Broth (TSB) and preconditioned in 3% galactose M9 minimum  
511 medium, hereafter GMM (17) for all the experiments unless specified otherwise. For GFP  
512 and RFP-labeled strains, 100  $\mu\text{g/ml}$  concentration of chloramphenicol antibiotic was  
513 supplemented in the growth media. TSB agar was used for enumerating colony forming  
514 units (CFU) and culturing purposes. X-gal was added to the agar plates to differentiate  
515 between *lac+* and *lac-* strains.

516

### 517 Genetic engineering

518 Isogenic mutants were created using methods described by Fazli et al (48). Briefly, single  
519 and double gene deletions were created by amplifying approximately 1000 bp upstream  
520 and downstream of the target gene and then joined using single overlap extension PCR  
521 using primers GW-attB1 and GW-attB2 (Table S2). The resulting approximately 2000 bp  
522 fragment was then inserted into a pDONPREX18Tp-Scel-PheS plasmid using Gateway  
523 cloning. For single-nucleotide mutations, the target gene was amplified, cloned into the  
524 above plasmid, and site-directed mutagenesis was used to create the intended point  
525 mutations. The resulting vectors were transformed into *E. coli* DH5 $\alpha$ , and then into *B.*  
526 *cenocepacia* by conjugation using tri-parental mating previously described (49). Mutants  
527 were then selected by sensitivity to 100  $\mu\text{g/ml}$  trimethoprim and sequenced using whole  
528 genome sequencing on an Illumina NextSeq 500 to a minimum coverage of 30x (50). We  
529 used the variant calling program Breseq v. 0.31 to confirm isogenic mutants to be used in  
530 the study (51).

531 To enable competitors to be distinguished in mixed culture, a *lacZ* marker was added  
532 using plasmid pCElacZ, as previously described using four parental conjugation (52). For  
533 confocal microscopy, WT and mutants were electro-transformed (53) with plasmids  
534 pSPY, which harbors yellow fluorescent protein genes and pSPR that contains red  
535 fluorescent protein from DsRedExpress (17) and were selected on TSB agar plates  
536 containing 100  $\mu\text{g/ml}$  chloramphenicol.

537

### 538 Fitness assay



539 The optical densities of the GMM preconditioned cultures were standardized, and  
540 competitors (lac+ and lac-) were mixed in defined ratios (1:1 for direct competition, and  
541 when testing for frequency-dependent interactions, at 1:9, 3:7, 7:3 and 9:1 ratios) into 5  
542 replicate tubes containing 5 ml of GMM medium + three 7 mm polystyrene beads each.  
543 For planktonic fitness assays, culture tubes contained no beads. An aliquot of that mixture  
544 was serially diluted and plated to get the starting CFU followed by incubation of tubes at  
545 37°C, shaking conditions. At 24 h, one bead was transferred using ethanol-sterilized  
546 forceps to a new culture tube containing two different colored beads to determine fitness  
547 at 48h while another was sonicated using a probe sonicator at a continuous pulse for 10  
548 secs at 30% amplitude. In the case of planktonic growth, a planktonic fraction was  
549 sampled for the CFU counts and for the inoculation in the new tube for 48 h measurement.  
550 The 24 and 48 h samples thus collected were serially diluted and plated on TSB X-gal  
551 plates. Selection rate was calculated as the difference in the Malthusian parameters of  
552 the two competitors using the equation,  $s = \ln[A(t)/A(0)] - \ln[B(t)/B(0)]$ , where A and B are  
553 the two competitors quantified at time 0 and t. The values were graphically represented  
554 and statistics were performed on Graphpad Prism 8. The Two-stage linear step-up  
555 procedure of Benjamini, Krieger, and Yekutieli, q value < 0.05 was used to perform  
556 pairwise comparisons post-hoc test.

557

#### 558 Quantification of cellular c-di-GMP

559 1.25 mL of preconditioned cultures were added to 125 mL of GMM in flasks containing  
560 100 7 mm polystyrene beads each and incubated at 100 rpm at 37 °C for 12 h. While  
561 harvesting, flasks were incubated on ice for 10 min. For planktonic phase, 25 ml of the  
562 culture was transferred to 50 ml centrifuge tube. For the biofilm phase, the planktonic  
563 culture was discarded and the beads were washed with 60 mL of cold PBS. These were  
564 then divided into four 50 mL centrifuge tubes containing 20 mL of cold PBS each. Each  
565 tube was vortexed for 30 s to remove the attached cells and the PBS from all 4 sets was  
566 combined. The samples were serially diluted and plated to enumerate CFU/flask and then  
567 centrifuged at max speed for 15 min at 25 °C. Pellets were resuspended in 500  $\mu$ L of ice-  
568 cold extraction buffer (methanol:acetonitrile:dH<sub>2</sub>O 40:40:20 + 0.1 N formic acid). The



569 suspensions were transferred to 1.5 mL microfuge tubes and incubated at -20 °C for 1 h,  
570 followed by 95 °C for 10 min. The tubes were then centrifuged to pellet the cell debris.  
571 400  $\mu$ L of the liquid phase was transferred to another microfuge tube and 16  $\mu$ L of  
572 neutralization buffer (15% ammonium bicarbonate) was added. The tubes were stored at  
573 -80 °C. Quantification of cdG using mass spectroscopy was then carried out as previously  
574 described (54).

575

#### 576 Biofilm assay

577 GMM preconditioned cultures were inoculated (1:100) in 96-well microtiter plate  
578 containing 200  $\mu$ l of GMM per well (the peripheral wells were not inoculated as were used  
579 as blank readings). The plate was incubated at 37°C under static conditions. The following  
580 day, medium was discarded, wells were washed using PBS and later stained with 0.1%  
581 crystal violet dye with subsequent 15 min incubation, as described (55). Ethanol solution  
582 (95% EtOH, 4.95% dH<sub>2</sub>O, 0.05% Triton X-100) was added to the wells to de-stain and  
583 the solution was transferred to a new plate. Absorbance was measured at 590 nm. The  
584 values were then normalized using blank readings and the resultant values were used to  
585 plot the graph.

586

#### 587 Colony morphology

588 GMM preconditioned cultures were spotted (4  $\mu$ l) on Congo red Tryptone 0.7% agar  
589 plates or serially diluted to plate on TSB 1.5% agar. The plates were incubated at 37°C  
590 under static conditions. Next day the plates were placed on the bench to allow structures  
591 to develop. The spot-colonies were imaged using Nikon D3300 with 18-55mm lens while  
592 the isolated colonies were captured on a brightfield microscope fitted to Canon DS126491  
593 with a 2X microscope adapter lens. Images were scaled using ImageJ.

594

#### 595 Confocal microscopy

596 Fluorescently labeled cultures were preconditioned in GMM + 100  $\mu$ g/ml chloramphenicol  
597 to maintain plasmid carriage. Equal volumes of these were added to a 1.5 ml microfuge  
598 tube containing 800  $\mu$ l GMM. The mix was vortexed and 200  $\mu$ l was transferred to an

599 optically clear bottom 96-well microtiter plate in triplicates. The plate was incubated at  
600 37°C at 100 rpm shaking conditions. The z- stack images of the biofilms formed at the  
601 bottom of the wells were taken using Olympus FLUOVIEW FV3000 confocal laser  
602 scanning microscope with 20 X objective lens [excitation at 488nm (EGFP) for YFP and  
603 560 nm (TRITC) for RFP]. For staining polysaccharides in biofilm, RFP labeled  
604 monocultures were inoculated in wells. At 24 h, the supernatant was carefully removed  
605 and 50  $\mu$ l of 50  $\mu$ g/ml fluorescein-tagged lectins (Concanavalin A for mannose and Ulex  
606 Europeus agglutinin for fucose, Vector Laboratories) were added (32). To stain cellulose,  
607 1:10 solution of Calcofluor white was added to the wells. After adding the stains, the plates  
608 were incubated at room temperature for 20 mins. The stain solutions were removed and  
609 wells gently washed by pipetting out the well contents and replacing with PBS. Biofilm  
610 images were captured at an excitation of 560 nm for RFP, 494 nm for fluorescein, and  
611 365 nm for Calcofluor white. The image stacks were analyzed using IMARIS 9 for creating  
612 orthogonal view images [Center for Biologic Imaging, University of Pittsburgh]. We used  
613 the IMARIS extension for Biofilm analysis by Matthew Gastinger to quantify biofilm  
614 parameters such as thickness, total biovolume, and biomass for each channel  
615 (<http://open.bitplane.com/tabid/235/Default.aspx?id=119>). The median of volumes  
616 calculated after the surface segmentation in IMARIS was used as average aggregate size  
617 value for each channel and the sum of the volumes was equal to the total biovolume  
618 calculated. Pearson coefficients were calculated using the Coloc function in IMARIS, as  
619 the measure of colocalization between two strains, ranging from 1 to -1 (56–58). Different  
620 letters are used to indicate significant differences between the data points (paired t-test  
621 calculated using the Two-stage linear step-up procedure of Benjamini, Krieger, and  
622 Yekutieli,  $q$  value < 0.05).

623

#### 624 Biofilm productivity

625 The optical densities of the GMM preconditioned cultures were standardized, and  
626 competitors (lac+ and lac-) were mixed in equal ratios in 5 replicate tubes containing 5 ml  
627 GMM + three 7mm polystyrene beads. The tubes were incubated at 37°C, shaken

628 conditions. At 24 h, the beads were sonicated and cells were plated on TSB X gal plates.  
629 The total cfu/ml was calculated from enumerated colonies.

630

### 631 Motility

632 TSB plates containing 0.3% agar were prepared on the previous day. The following day,  
633 GMM preconditioned cultures were spotted on the plates with a toothpick. Each plate had  
634 a mutant and a WT control. The plates were incubated without turning upside down at  
635 37°C. Colony diameter was measured at 18h and expressed relative to the corresponding  
636 WT diameter.

637

### 638 RNA-seq

639 1.25 mL of three independent preconditioned cultures were added to 125 mL of GMM in  
640 flasks containing 100 7mm polystyrene beads each and incubated at 100 rpm at 37 °C  
641 for 16 hours. For each flask, the suspension was discarded and the beads were washed  
642 with 60 mL of cold PBS. These were then divided into four 50 mL centrifuge tubes  
643 containing 20 mL of cold PBS each. Each tube was vortexed for 30 s to remove the  
644 attached cells and the PBS from all 4 sets was combined. The suspension was  
645 centrifuged at max speed for 15 min at 25 °C. 500uL of RNAprotect was added to the  
646 final cell pellet followed by RNA extraction with Amresco Phenol Free RNA kits. The  
647 RNA was sequenced at Genewiz and the reads were pseudo-aligned to the HI2424  
648 genome using Kallisto version 0.46 (59). Read counts were quantified through Kallisto  
649 at 1000 bootstraps per sample. Differential gene expression analysis began by feeding  
650 the raw, quantified read counts into edgeR (60). Raw read counts were first normalized  
651 to counts per million, and then further normalized using edgeR's TMM normalization  
652 method. Differentially expressed genes were called by invoking edgeR's Genewiz  
653 negative binomial generalized linear model, whereby variance was inferred between  
654 treatments' replicates. Genes that displayed  $q < .05$ ,  $IFold\ Change > 1.5$  and at least  
655 half of the replicates with counts per million  $> 1$  were considered differentially  
656 expressed. The genes demonstrating statistically significant fold change with respect to  
657 wildtype in at least 4 strains were organized by functional categories using

658 <https://www.burkholderia.com>. The raw reads are available at NCBI Bioproject  
659 PRJNA607303.

660

661 Statistical analyses

662 Statistical analyses were conducted in Graphpad Prism 8 for Mac OS X, GraphPad  
663 Software, La Jolla California USA, [www.graphpad.com](http://www.graphpad.com), or in R (61). Mutant comparisons  
664 were conducted by one-way ANOVA with post hoc testing using the two-stage linear step-  
665 up procedure of Benjamini, Krieger, and Yekutieli.

666

667 Acknowledgments

668 This research was supported by grants NIH R01GM110444 and NASA NAI CAN-7  
669 NNA15BB04A to VSC. We thank Prof. Simon C. Watkins, director of Center for Biologic  
670 Imaging (CBI), University of Pittsburgh for IMARIS support and image analysis  
671 assistance, members of the Cooper laboratory and Evan Waldron (Rutgers) for helpful  
672 discussions and proof reading, and Christopher Deitrick for bioinformatics help and  
673 depositing RNAseq files in the NCBI database.

674

675

676 **Table 1**

677 Table 1: Distribution of *rpfR* mutations by domains and statistical enrichment in linker regions ( $X^2$   
678 = 10.47, df=1,  $p = 0.0012$ ). Mutation probability is calculated for 51 SNPs only from Table S1,  
679 assuming probability proportionate to domain size. A full list of mutations is present in Table S1.  
680

| Domain               | Observed mutations | Expected mutations | Residues                      |
|----------------------|--------------------|--------------------|-------------------------------|
| FI                   | 3                  | 7.125              | 1-95                          |
| PAS                  | 8                  | 8.25               | 113-222                       |
| GGDEF (DGC)          | 13 <sup>a</sup>    | 12.225             | 235-397                       |
| Linker regions       | 8                  | 2.175              | 96-113,<br>222-235<br>398-409 |
| EAL (PDE)            | 19 <sup>b</sup>    | 19.2               | 409-664                       |
| GGDEF+EAL            | 1                  | n/a                | 235-664                       |
| Full deletion + rpfF | 18                 | n/a                |                               |
| Full deletion        | 2                  | n/a                | 1-680                         |
| Sum, SNPs only       | 51                 |                    |                               |
| Sum                  | 72                 |                    |                               |

681  
682  
683

684 **Figure Legends**

685

686 **Fig 1. RpfR is the dominant target of selection in *Burkholderia* biofilms.** (A)

687 Hypothesized model of BDSF signaling and c-di-GMP metabolism by the RpfR-RpfF

688 regulon. RpfR consists of four domains: i) RpfF-inhibiting or FI domain, ii) Per-Arnt-Sim

689 (PAS) sensor, iii) a diguanylate cyclase (DGC) domain with GGDEF motif and iv) a

690 phosphodiesterase (PDE) domain with EAL motif. Its adjacent gene product RpfF is an

691 enoyl-CoA-hydratase that produces *Burkholderia* Diffusible Signal Factor (BDSF). Panel

692 I: The DGC domain, when active (blue), synthesizes c-di-GMP, a second messenger that

693 regulates biofilm formation and motility. Panel II: BDSF binds the PAS domain and

694 induces c-di-GMP degradation by activating the PDE domain (red). Panel III: The FI

695 domain of RpfR binds RpfF and forms a complex that inhibits BDSF production (12, 14,

696 47) (B) Evolved *rpfR* mutations during experimental selection in biofilm (blue), planktonic

697 (red), alternating biofilm and planktonic growth (purple) and chronic infections of the CF

698 lung (green). Mutations are disproportionately enriched in linker regions (gray shading)

699 between the sensor and catalytic domains, and at four residues (Table 1).

700

701 **Fig. 2. Evolved and engineered *rpfR* genotypes produce diverse c-di-GMP-**

702 **regulated phenotypes.** (A) Colony characteristics of evolved and engineered mutants

703 on Congo Red, tryptone agar plates. (B) Biofilm productivity measured by crystal violet

704 staining. Evolved mutants are in colors and engineered mutants are in grey. (C) Relative

705 levels of c-di-GMP to WT measured at 12 (C) and (D) 24 hours in biofilm (black letters)

706 and planktonic conditions (blue letters). Error bars are 95% c.i. Letters denote significant

707 differences between mutants (one-way ANOVA, post hoc comparisons q value < 0.05).

708

709 **Fig. 3. Fitness of *rpfR* genotypes as a function of c-di-GMP levels.** (A) Non-linear

710 relationship (segmental linear regression,  $r^2 = 0.77$ ) between c-di-GMP production at 12

711 h and fitness in biofilm at 24 h for evolved mutants. Engineered mutants shown in grey,

712 not included in function. (B) Relative fitness vs. WT during 24h and 48 h in the biofilm

713 model. Different letters indicate significant differences between genotypes by posthoc

714 testing following ANOVA. (C) Fitness differences between *rpfR* mutants after 24h of  
715 competition starting from different starting frequencies. The intersection between the  
716 regression lines and the x-axis is the predicted mutant frequencies at equilibrium. Error  
717 bars are 95% c.i.

718

719 **Fig. 4. Cocultures of evolved mutants exhibit complementary interactions.** (A)  
720 Confocal images show structural differences between single strain and coculture biofilms.  
721 Large, dispersed aggregates are seen for Y355D, A106P, and Y355D x A106P;  
722 monocultures of  $\Delta rpfRF+93$  and its cocultures (A106P x  $\Delta rpfRF+93$ , and Y355D x  
723  $\Delta rpfRF+93$ ) produce small clusters and uniform thickness. RFP-labeled cells are false-  
724 colored in magenta and YFP-labelled cells in yellow. White spots indicate coaggregation  
725 of differently labeled strains (scale = 10 $\mu$ m). (B) Correlation between average aggregate  
726 size of attached aggregate and biofilm thickness. (C) Total biofilm productivity as CFU of  
727 individual strains in coculture. A106P, green, Y355D, blue,  $\Delta rpfRF+93$ , red. Expected  
728 (exp) values are projected from the individual competitions while the observed (obs)  
729 values are experimentally determined. Letters denote significant pairwise statistical  
730 groupings. (D) Coaggregation in biofilms, where positive coefficients indicate the extent  
731 of overlap between two channels (values significantly different than 0 are denoted with \*).

732

733 **Fig. 5: Varied exopolysaccharide (EPS) composition of evolved *rpfR* mutants.**  
734 Biovolumes were calculated from the fluorescent intensities of bound fluorescently tagged  
735 lectins, relative to total bacterial volume, for (A) mannose and (B) fucose or calcofluor for  
736 (C) cellulose, and labeled cells using IMARIS 9.0. Different letters indicate significant  
737 differences between the mutants.

738

739 **Fig. 6. Global changes in expression in evolved and engineered *rpfR* and *rpfF***  
740 **mutants grown in biofilms.** Genes that differentiated 4 or 5 mutants from WT are shown  
741 and categorized by function (q value <0.05). Upregulated and downregulated processes  
742 are plotted in shades of blue and orange, respectively. Results are from three biological  
743 replicates and were analyzed as described in Methods.

744

745 **Fig. 7. Predicted effects of biofilm-adapted *rpfR* mutants on the RpfR/F signaling**  
746 **complex.** Top left: the WT genotype produces sparse biofilms owing to its production (a)  
747 and sensing of BDSF, which binds RpfR-PAS and activates the RpfR-EAL  
748 phosphodiesterase domain that hydrolyzes c-di-GMP (orange color gradient, b). The  
749 RpfR-FI domain limits RpfF activity by binding and inhibiting BDSF synthesis, enabling c-  
750 di-GMP levels to recover to low levels (c). Top right: the Y355D genotype hyper-activates  
751 the GGDEF domain and increases c-di-GMP, resulting in large biofilm aggregates.  
752 Although BDSF binding to RpfR-PAS can activate the phosphodiesterase domain, c-di-  
753 GMP levels remain high (blue color gradient). Bottom left: we hypothesize that A106P in  
754 the linker region between the FI and PAS domains prevents a conformational change  
755 caused by the BDSF-PAS interaction, rendering this genotype blind to BDSF. Hence, c-  
756 di-GMP levels increase slightly either by the action of RpfR or other DGCs. This mutant  
757 also forms large biofilm aggregates. Bottom right: In the absence of both RpfF and RpfR,  
758 no BDSF is produced and c-di-GMP levels produced by other enzymes accumulate,  
759 producing a biofilm composed of small aggregates. This phenotype is dominant to the  
760 other genotypes, and mixtures take on this more uniform biofilm phenotype.

761

762



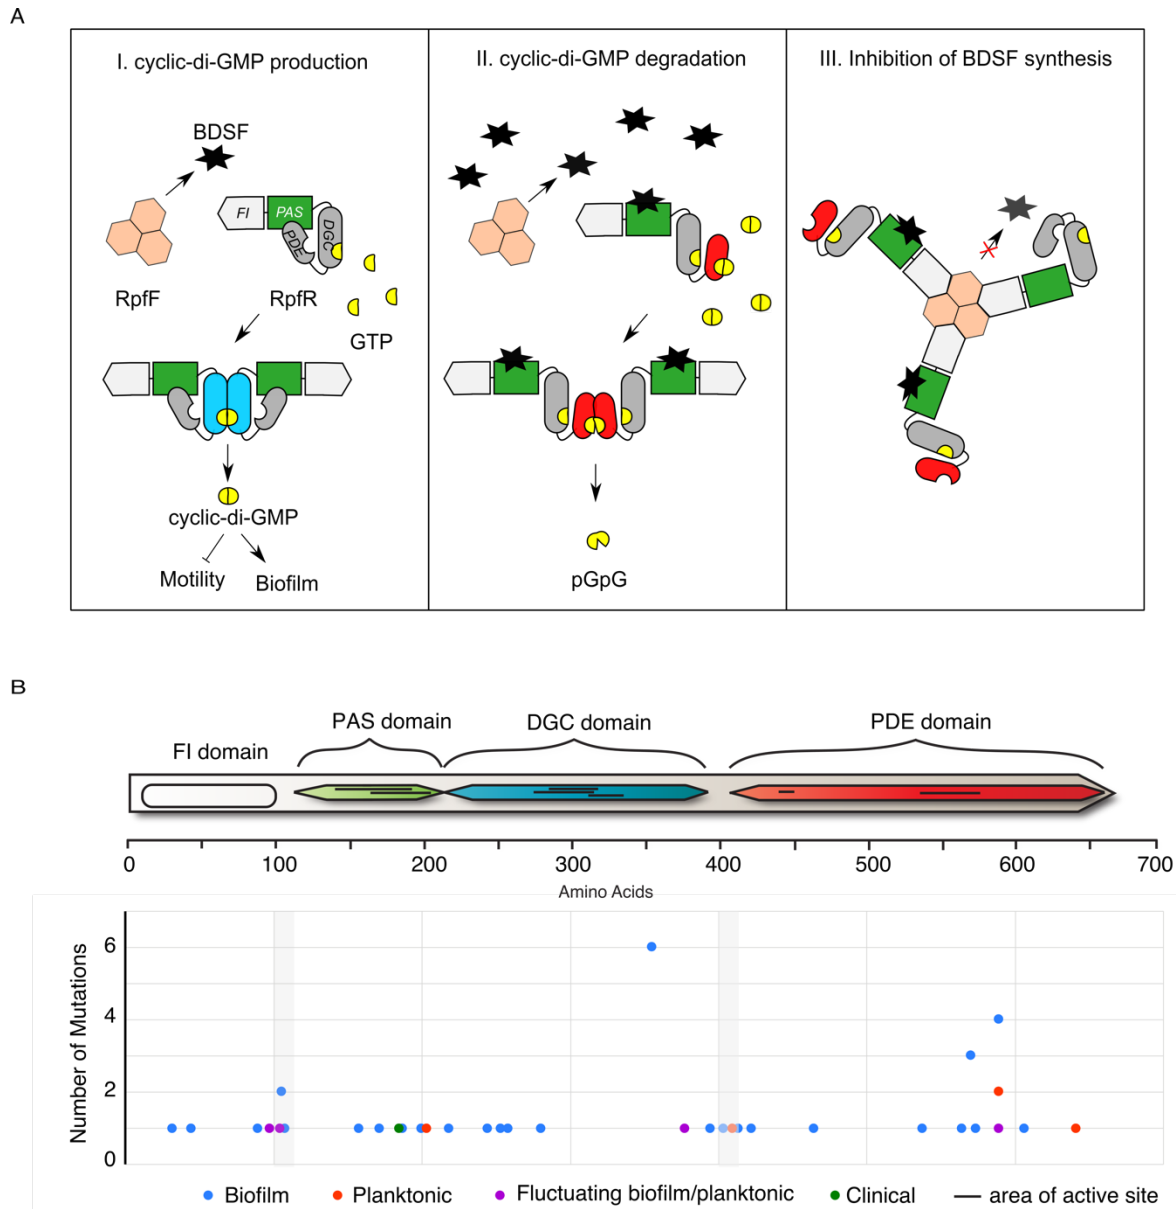

763

764 Figure 1

765

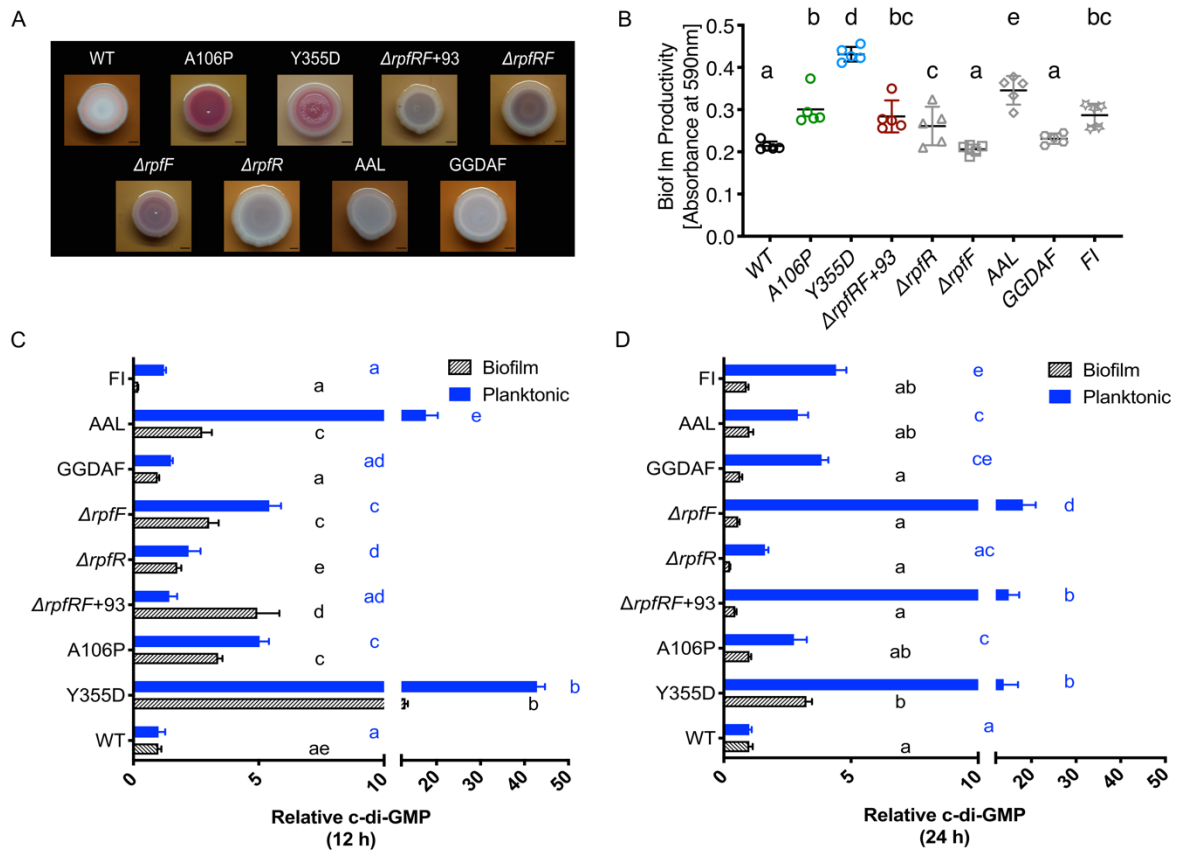

766

767 Figure 2

768

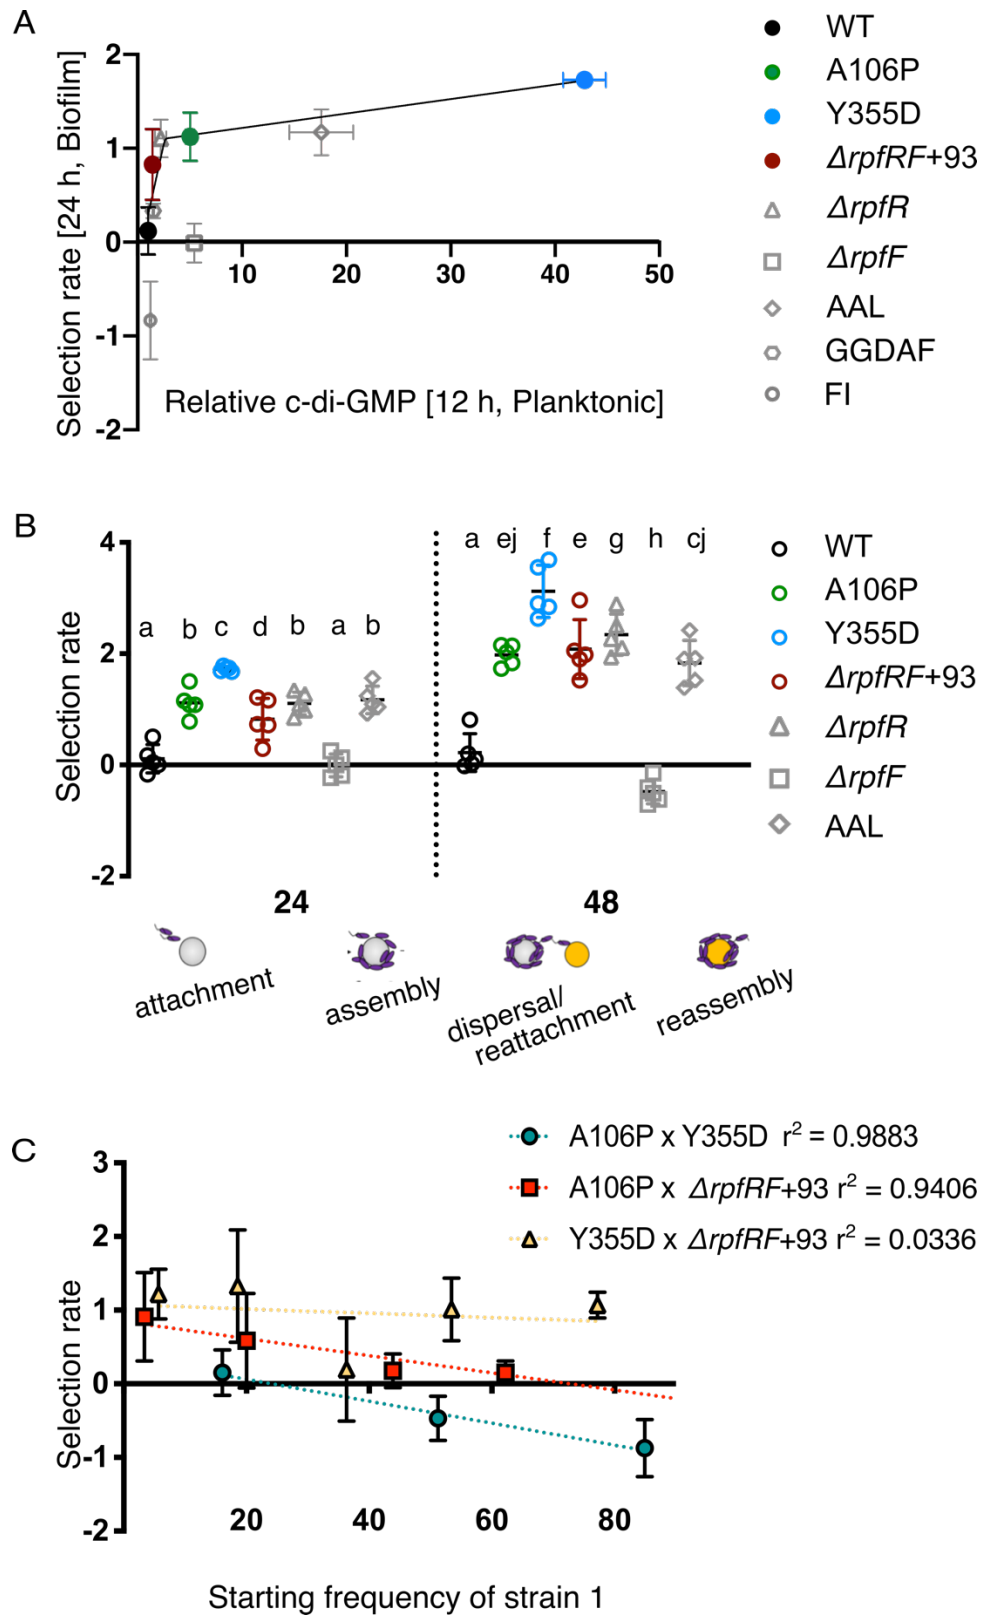

769

770 Figure 3

771

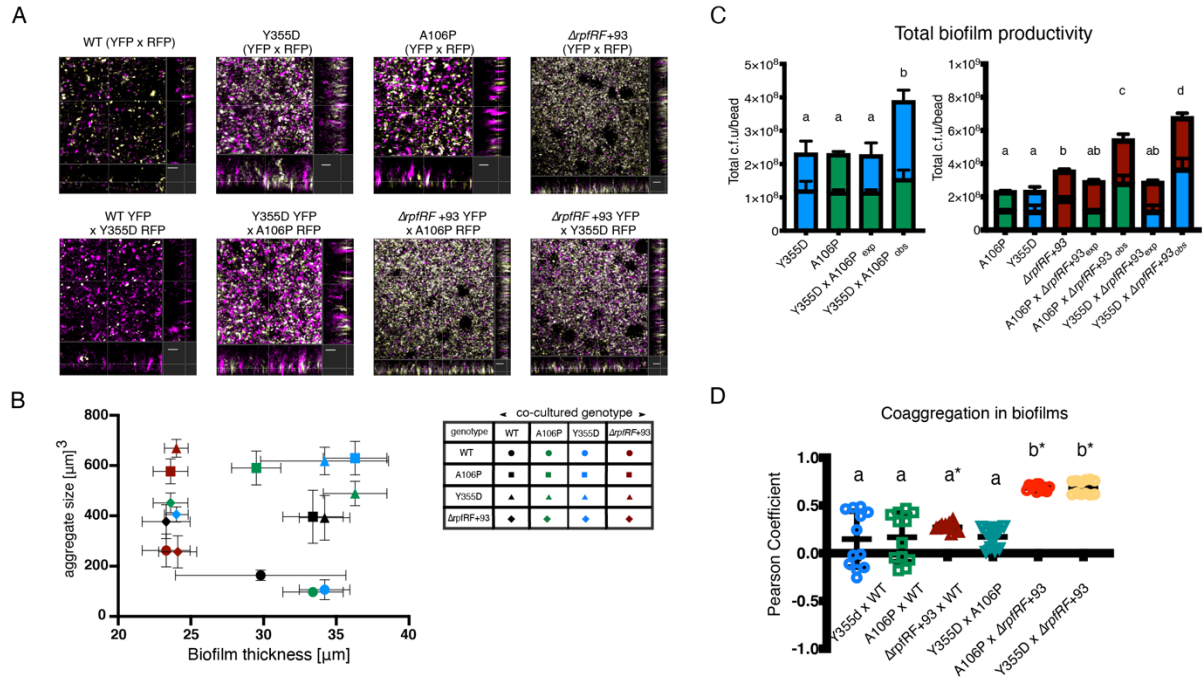

772

773 Figure 4

774

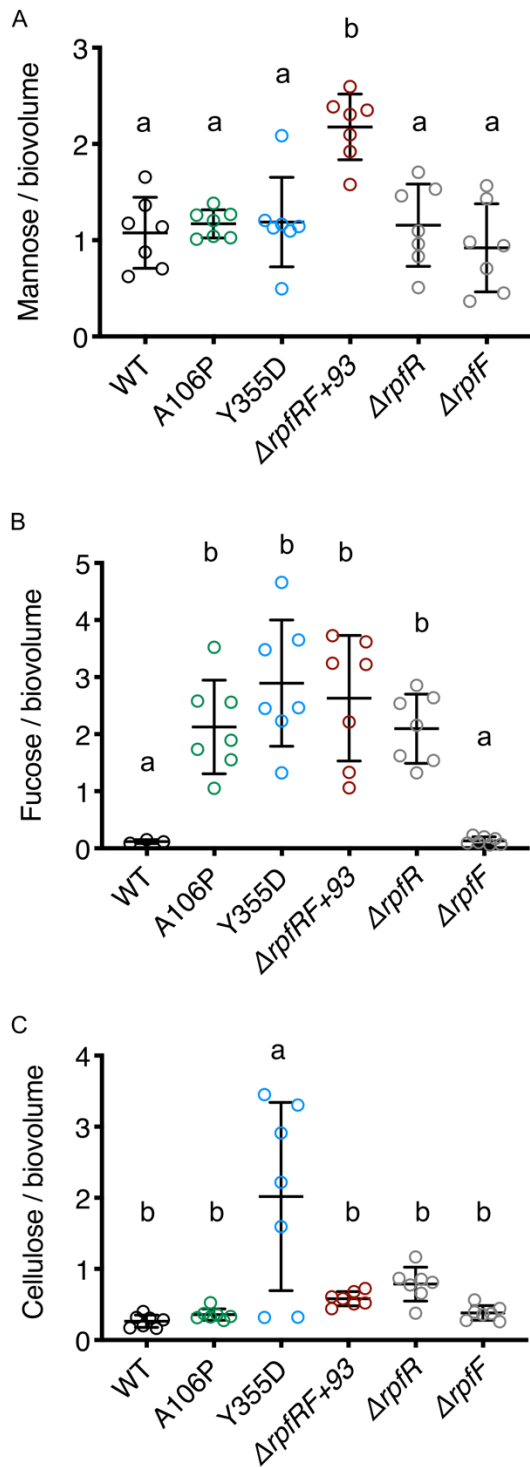

775

776 Figure 5

777

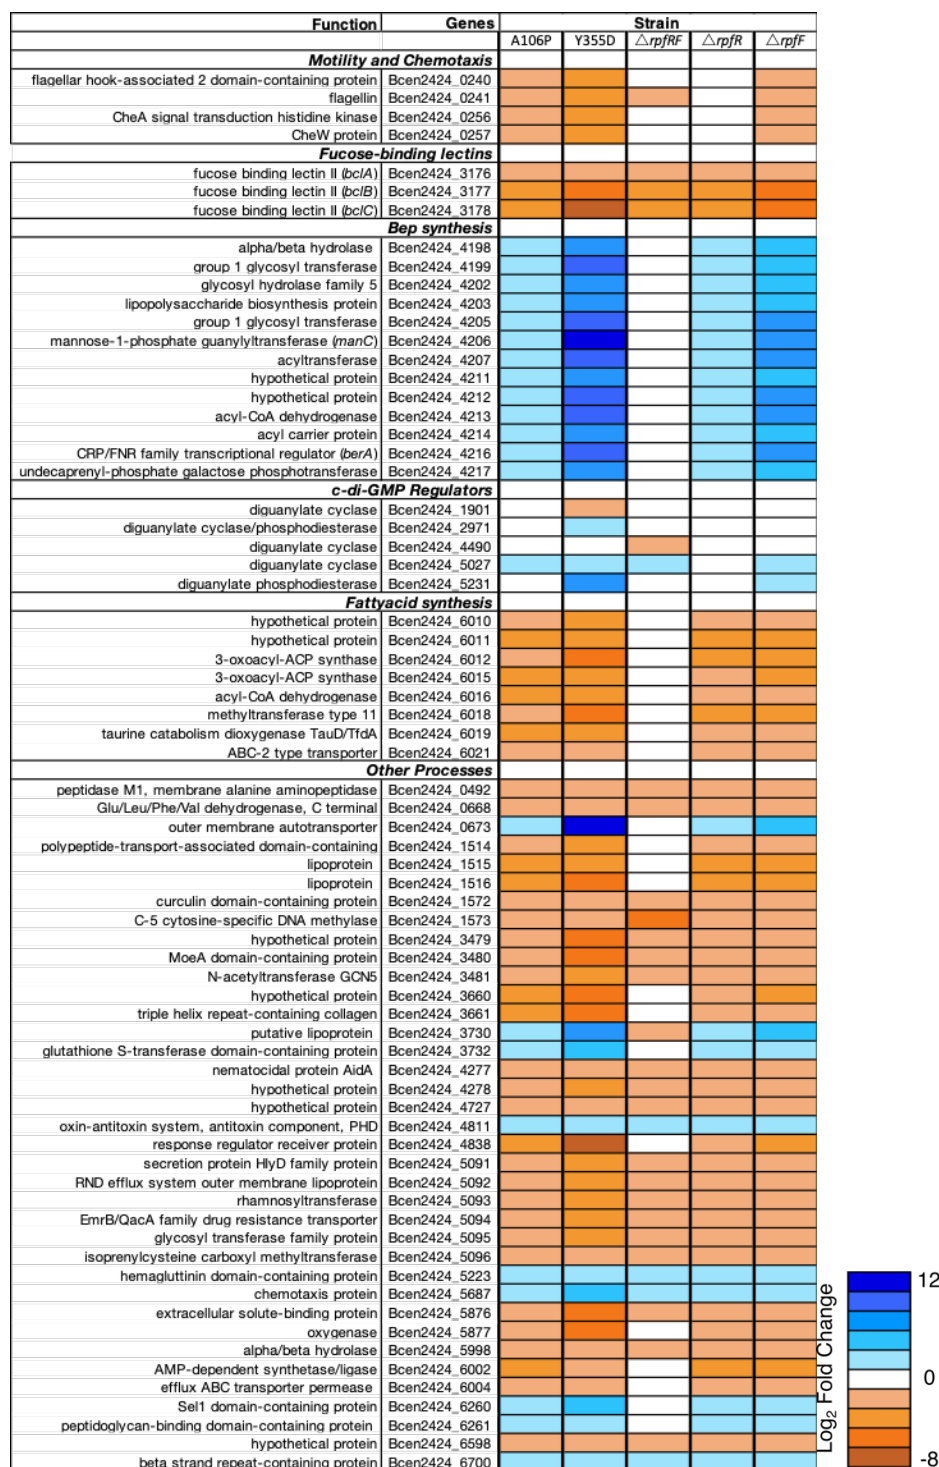

778

779 Figure 6

780

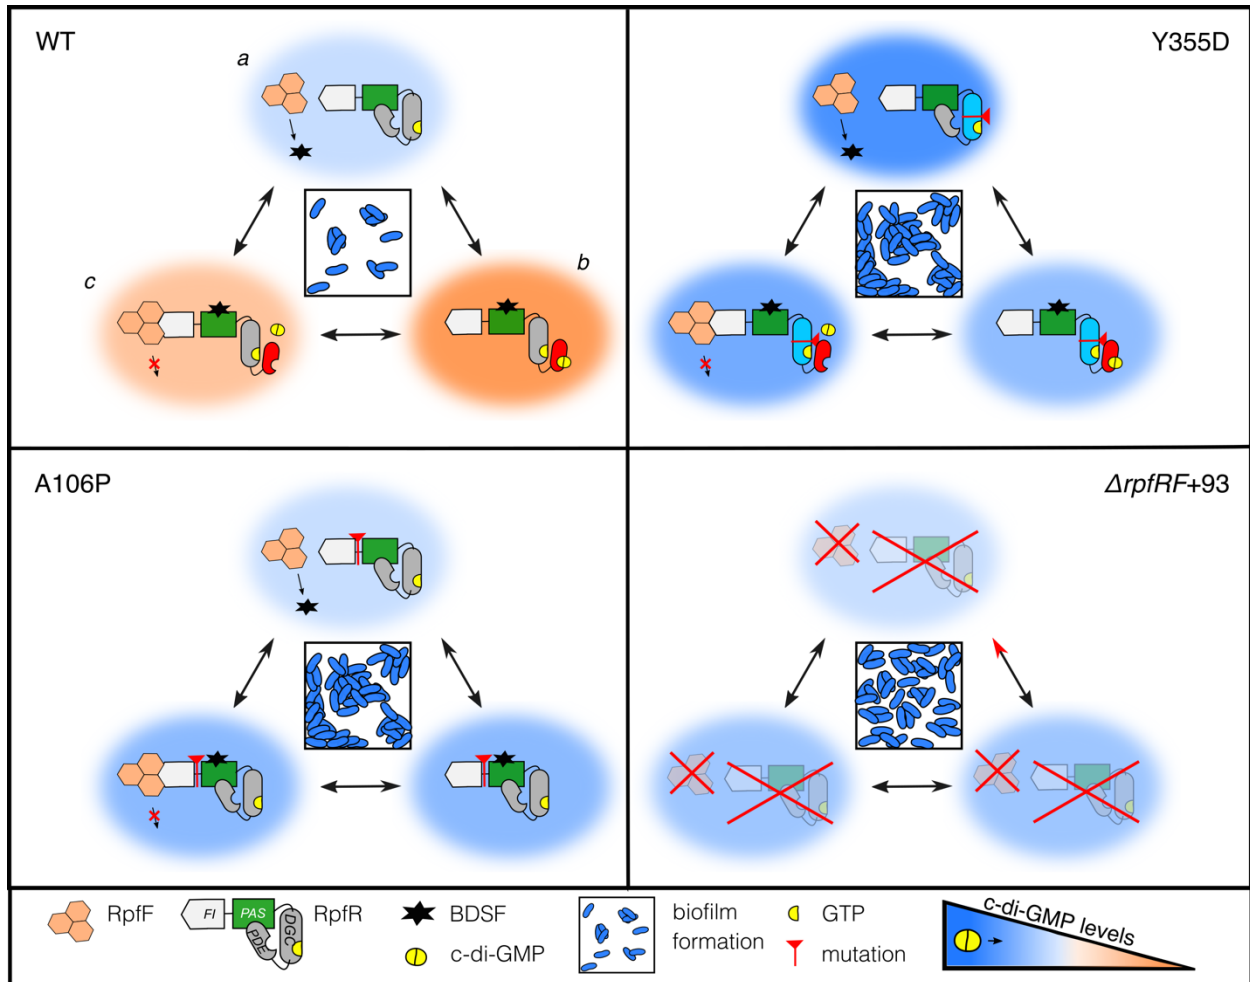

781

782 Figure 7.

## 783 References

- 784 1. B. J. Koestler, C. M. Waters, Exploring Environmental Control of Cyclic di-GMP Signaling  
785 in *Vibrio cholerae* by Using the Ex Vivo Lysate Cyclic di-GMP Assay (TELCA). *Appl*  
786 *Environ Microbiol* **79**, 5233–5241 (2013).
- 787 2. U. Römling, M. Y. Galperin, M. Gomelsky, Cyclic di-GMP: the First 25 Years of a  
788 Universal Bacterial Second Messenger. *Microbiol. Mol. Biol. Rev.* **77**, 1–52 (2013).
- 789 3. J. Yan, *et al.*, Bow-tie signaling in c-di-GMP: Machine learning in a simple biochemical  
790 network. *PLoS Comput. Biol.* **13**, e1005677 (2017).
- 791 4. L. Townsley, F. H. Yildiz, Temperature affects c-di-GMP signaling and biofilm formation  
792 in *Vibrio cholerae*. *Environ Microbiol* **17**, 4290–4305 (2015).
- 793 5. T. N. Dalia, *et al.*, Enhancing multiplex genome editing by natural transformation  
794 (MuGENT) via inactivation of ssDNA exonucleases. *Nucleic Acids Res.* **45**, 7527–7537  
795 (2017).
- 796 6. K. M. Dahlstrom, *et al.*, A Multimodal Strategy Used by a Large c-di-GMP Network.  
797 *Journal of Bacteriology* **200**, e00703-17 (2018).
- 798 7. Y. Luo, *et al.*, A Hierarchical Cascade of Second Messengers Regulates *Pseudomonas*  
799 *aeruginosa* Surface Behaviors. *mBio* **6**, e02456-14 (2015).
- 800 8. L. Vial, A. Chapalain, M.-C. Groleau, E. Déziel, The various lifestyles of the Burkholderia  
801 cepacia complex species: a tribute to adaptation. *Environmental Microbiology* **13**, 1–12  
802 (2011).
- 803 9. A. M. Richter, *et al.*, Key Players and Individualists of Cyclic-di-GMP Signaling in  
804 Burkholderia cenocepacia. *Front Microbiol* **9**, 3286 (2018).
- 805 10. B. Huber, *et al.*, Genetic analysis of functions involved in the late stages of biofilm  
806 development in Burkholderia cepacia H111. *Molecular Microbiology* **46**, 411–426 (2002).
- 807 11. Y. Deng, *et al.*, Cis-2-dodecenoic acid receptor RpfR links quorum-sensing signal  
808 perception with regulation of virulence through cyclic dimeric guanosine monophosphate  
809 turnover. *Proc. Natl. Acad. Sci. U.S.A.* **109**, 15479–15484 (2012).
- 810 12. E. J. Waldron, *et al.*, Structural basis of DSF recognition by its receptor RpfR and its  
811 regulatory interaction with the DSF synthase RpfF. *PLoS Biol* **17** (2019).
- 812 13. C. C. Traverse, L. M. Mayo-Smith, S. R. Poltak, V. S. Cooper, Tangled bank of  
813 experimentally evolved Burkholderia biofilms reflects selection during chronic infections.  
814 *Proc Natl Acad Sci U S A* **110**, E250–E259 (2013).
- 815 14. C. Yang, *et al.*, Burkholderia cenocepacia integrates cis-2-dodecenoic acid and cyclic  
816 dimeric guanosine monophosphate signals to control virulence. *Proc. Natl. Acad. Sci.*  
817 *U.S.A.* **114**, 13006–13011 (2017).



- 818 15. V. S. Cooper, Experimental Evolution as a High-Throughput Screen for Genetic  
819 Adaptations. *mSphere* **3** (2018).
- 820 16. C. P. Bagowski, W. Bruins, A. J. W. te Velhuis, The Nature of Protein Domain Evolution:  
821 Shaping the Interaction Network. *Curr Genomics* **11**, 368–376 (2010).
- 822 17. S. R. Poltak, V. S. Cooper, Ecological succession in long-term experimentally evolved  
823 biofilms produces synergistic communities. *ISME J* **5**, 369–378 (2011).
- 824 18. C. N. Ellis, C. C. Traverse, L. Mayo-Smith, S. W. Buskirk, V. S. Cooper, Character  
825 displacement and the evolution of niche complementarity in a model biofilm community.  
826 *Evolution* **69**, 283–293 (2015).
- 827 19. I. N. Silva, *et al.*, Long-Term Evolution of Burkholderia multivorans during a Chronic  
828 Cystic Fibrosis Infection Reveals Shifting Forces of Selection. *mSystems* **1** (2016).
- 829 20. C. B. Turner, C. W. Marshall, V. S. Cooper, Parallel genetic adaptation across  
830 environments differing in mode of growth or resource availability. *Evol Lett* **2**, 355–367  
831 (2018).
- 832 21. C. B. Turner, S. W. Buskirk, K. B. Harris, V. S. Cooper, Negative frequency-dependent  
833 selection maintains coexisting genotypes during fluctuating selection. *Mol. Ecol.* **29**, 138–  
834 148 (2020).
- 835 22. C. J. Jones, D. J. Wozniak, Congo Red Stain Identifies Matrix Overproduction and Is an  
836 Indirect Measurement for c-di-GMP in Many Species of Bacteria. *Methods Mol. Biol.* **1657**,  
837 147–156 (2017).
- 838 23. K. M. Flynn, *et al.*, Evolution of Ecological Diversity in Biofilms of Pseudomonas  
839 aeruginosa by Altered Cyclic Diguanylate Signaling. *J. Bacteriol.* **198**, 2608–2618 (2016).
- 840 24. S. Lindenberg, G. Klauck, C. Pesavento, E. Klauck, R. Hengge, The EAL domain protein  
841 YciR acts as a trigger enzyme in a c-di-GMP signalling cascade in E. coli biofilm control.  
842 *EMBO J.* **32**, 2001–2014 (2013).
- 843 25. H. Weber, C. Pesavento, A. Possling, G. Tischendorf, R. Hengge, Cyclic-di-GMP-mediated  
844 signalling within the sigma network of Escherichia coli. *Mol. Microbiol.* **62**, 1014–1034  
845 (2006).
- 846 26. D.-G. Ha, M. E. Richman, G. A. O’Toole, Deletion mutant library for investigation of  
847 functional outputs of cyclic diguanylate metabolism in Pseudomonas aeruginosa PA14.  
848 *Appl. Environ. Microbiol.* **80**, 3384–3393 (2014).
- 849 27. A. Ross-Gillespie, A. Gardner, S. A. West, A. S. Griffin, Frequency dependence and  
850 cooperation: theory and a test with bacteria. *Am. Nat.* **170**, 331–342 (2007).
- 851 28. A. S. Ferreira, *et al.*, Functional analysis of Burkholderia cepacia genes bceD and bceF,  
852 encoding a phosphotyrosine phosphatase and a tyrosine autokinase, respectively: role in

- 853 exopolysaccharide biosynthesis and biofilm formation. *Appl. Environ. Microbiol.* **73**, 524–  
854 534 (2007).
- 855 29. M. Fazli, *et al.*, The CRP/FNR family protein Bcam1349 is ac-di-GMP effector that  
856 regulates biofilm formation in the respiratory pathogen *Burkholderia cenocepacia*.  
857 *Molecular microbiology* **82**, 327–341 (2011).
- 858 30. M. Fazli, *et al.*, Regulation of *Burkholderia cenocepacia* biofilm formation by RpoN and  
859 the c-di-GMP effector BerB. *MicrobiologyOpen* **6**, e00480 (2017).
- 860 31. B. Cuzzi, *et al.*, Versatility of the *Burkholderia cepacia* complex for the biosynthesis of  
861 exopolysaccharides: a comparative structural investigation. *PLoS One* **9**, e94372 (2014).
- 862 32. B. S. Tseng, *et al.*, Quorum sensing influences *Burkholderia thailandensis* biofilm  
863 development and matrix production. *Journal of bacteriology*, JB. 00047-16 (2016).
- 864 33. M. Fazli, Y. McCarthy, M. Givskov, R. P. Ryan, T. Tolker-Nielsen, The exopolysaccharide  
865 gene cluster Bcam1330–Bcam1341 is involved in *Burkholderia cenocepacia* biofilm  
866 formation, and its expression is regulated by c-di-GMP and Bcam1349. *Microbiologyopen*  
867 **2**, 105–122 (2013).
- 868 34. B. Wu, Y. Zhang, R. Zheng, C. Guo, P. G. Wang, Bifunctional phosphomannose  
869 isomerase/GDP-D-mannose pyrophosphorylase is the point of control for GDP-D-mannose  
870 biosynthesis in *Helicobacter pylori*. *FEBS letters* **519**, 87–92 (2002).
- 871 35. C. Berne, A. Ducret, G. G. Hardy, Y. V. Brun, Adhesins involved in attachment to abiotic  
872 surfaces by Gram-negative bacteria. *Microbiology spectrum* **3** (2015).
- 873 36. O. Šulák, *et al.*, *Burkholderia cenocepacia* BC2L-C is a super lectin with dual specificity  
874 and proinflammatory activity. *PLoS pathogens* **7**, e1002238 (2011).
- 875 37. E. Lameignere, *et al.*, Structural basis for mannose recognition by a lectin from  
876 opportunistic bacteria *Burkholderia cenocepacia*. *Biochemical Journal* **411**, 307–318  
877 (2008).
- 878 38. R. Kassen, The experimental evolution of specialists, generalists, and the maintenance of  
879 diversity. *J Evol Biol* **15**, 173–190 (2002).
- 880 39. Y. Deng, J. Wu, L. Eberl, L.-H. Zhang, Structural and functional characterization of  
881 diffusible signal factor family quorum-sensing signals produced by members of the  
882 *Burkholderia cepacia* complex. *Appl. Environ. Microbiol.* **76**, 4675–4683 (2010).
- 883 40. H. Bi, Y. Yu, H. Dong, H. Wang, J. E. Cronan, *Xanthomonas campestris* RpfB is a fatty  
884 Acyl-CoA ligase required to counteract the thioesterase activity of the RpfF diffusible  
885 signal factor (DSF) synthase. *Molecular microbiology* **93**, 262–275 (2014).
- 886 41. F. Rao, *et al.*, The functional role of a conserved loop in EAL domain-based cyclic di-  
887 GMP-specific phosphodiesterase. *Journal of bacteriology* **191**, 4722–4731 (2009).

- 888 42. H. Bi, Q. H. Christensen, Y. Feng, H. Wang, J. E. Cronan, The Burkholderia cenocepacia  
889 BDSF quorum sensing fatty acid is synthesized by a bifunctional crotonase homologue  
890 having both dehydratase and thioesterase activities. *Molecular microbiology* **83**, 840–855  
891 (2012).
- 892 43. R. Hengge, A. Gründling, U. Jenal, R. Ryan, F. Yildiz, Bacterial signal transduction by  
893 cyclic di-GMP and other nucleotide second messengers. *Journal of bacteriology* **198**, 15–  
894 26 (2016).
- 895 44. Z. Zhang, Mutualism or cooperation among competitors promotes coexistence and  
896 competitive ability. *Ecological Modelling* **164**, 271–282 (2003).
- 897 45. A. Audfray, *et al.*, Fucose-binding lectin from opportunistic pathogen Burkholderia  
898 ambifaria binds to both plant and human oligosaccharidic epitopes. *Journal of Biological*  
899 *Chemistry* **287**, 4335–4347 (2012).
- 900 46. P. Drevinek, E. Mahenthiralingam, Burkholderia cenocepacia in cystic fibrosis:  
901 epidemiology and molecular mechanisms of virulence. *Clinical Microbiology and Infection*  
902 **16**, 821–830 (2010).
- 903 47. N. Schmid, *et al.*, The AHL-and BDSF-dependent quorum sensing systems control specific  
904 and overlapping sets of genes in Burkholderia cenocepacia H111. *PLoS One* **7**, e49966  
905 (2012).
- 906 48. M. Fazli, J. J. Harrison, M. Gambino, M. Givskov, T. Tolker-Nielsen, In-frame and  
907 unmarked gene deletions in Burkholderia cenocepacia via an allelic exchange system  
908 compatible with gateway technology. *Applied and environmental microbiology* **81**, 3623–  
909 3630 (2015).
- 910 49. M. Juhas, *et al.*, High Confidence Prediction of Essential Genes in Burkholderia  
911 Cenocepacia. *PLOS ONE* **7**, e40064 (2012).
- 912 50. M. Baym, *et al.*, Inexpensive multiplexed library preparation for megabase-sized genomes.  
913 *PLoS One* **10**, e0128036 (2015).
- 914 51. D. E. Deatherage, J. E. Barrick, “Identification of mutations in laboratory-evolved microbes  
915 from next-generation sequencing data using breseq” in *Engineering and Analyzing*  
916 *Multicellular Systems*, (Springer, 2014), pp. 165–188.
- 917 52. C. N. Ellis, V. S. Cooper, Experimental adaptation of Burkholderia cenocepacia to onion  
918 medium reduces host range. *Applied and environmental microbiology* **76**, 2387–2396  
919 (2010).
- 920 53. N. Dubarry, W. Du, D. Lane, F. Pasta, Improved electrotransformation and decreased  
921 antibiotic resistance of the cystic fibrosis pathogen Burkholderia cenocepacia strain J2315.  
922 *Applied and environmental microbiology* **76**, 1095–1102 (2010).

- 923 54. J. P. Massie, *et al.*, Quantification of high-specificity cyclic diguanylate signaling.  
924 *Proceedings of the National Academy of Sciences* **109**, 12746–12751 (2012).
- 925 55. G. A. O’Toole, Microtiter Dish Biofilm Formation Assay. *J Vis Exp* (2011)  
926 <https://doi.org/10.3791/2437> (January 21, 2020).
- 927 56. B. Moser, B. Hochreiter, R. Herbst, J. A. Schmid, Fluorescence colocalization microscopy  
928 analysis can be improved by combining object-recognition with pixel-intensity-correlation.  
929 *Biotechnology journal* **12**, 1600332 (2017).
- 930 57. E. Manders, J. Stap, G. Brakenhoff, R. Van Driel, J. Aten, Dynamics of three-dimensional  
931 replication patterns during the S-phase, analysed by double labelling of DNA and confocal  
932 microscopy. *Journal of cell science* **103**, 857–862 (1992).
- 933 58. Q. Wang, C. J. Wright, H. Dingming, S. M. Uriarte, R. J. Lamont, Oral community  
934 interactions of Filifactor aloicis in vitro. *PLoS One* **8**, e76271 (2013).
- 935 59. N. L. Bray, H. Pimentel, P. Melsted, L. Pachter, Near-optimal probabilistic RNA-seq  
936 quantification. *Nat. Biotechnol.* **34**, 525–527 (2016).
- 937 60. M. D. Robinson, D. J. McCarthy, G. K. Smyth, edgeR: a Bioconductor package for  
938 differential expression analysis of digital gene expression data. *Bioinformatics* **26**, 139–140  
939 (2010).
- 940 61. C. RDevelopment, “TEAM 2012. R: A language and environment for statistical computing.  
941 R Foundation for Statistical Computing, Vienna” (ISBN 3-900051-07-0, URL <http://www.R-project.org>).  
942

943

## Supplementary Information

### Supplementary data tables

Table S1: Evolved *rpfR* mutations identified from whole-population genomic sequencing of experimental populations (>5% or greater frequency) or from isolated clones from the experiment or biofilm-associated infection.

| Amino acid | Annotation             | Type  | Study                 | Population | Experimental setup             | Media    | REF   | Domain            |
|------------|------------------------|-------|-----------------------|------------|--------------------------------|----------|-------|-------------------|
| 185        | E185D                  | SNP   | <i>B. multivorans</i> |            | Chronic infection of CF airway | Clinical | (1)   | PAS               |
| DEL        | 95 gene deletion       | Indel | Carbon limitation     | 1          | Biofilm                        | 1% GMM   | (2).  | All + <i>rpfF</i> |
| 464        | F464C (TTC-TGC)        | SNP   | Carbon limitation     | 1          | Biofilm                        | 1% GMM   |       | EAL               |
| 570        | S570L (TCG-TTG)        | SNP   | Carbon limitation     | 1          | Biofilm                        | 1% GMM   |       | EAL               |
| 377        | R377H (CGC-CAC)        | SNP   | Carbon limitation     | 3          | Biofilm                        | 1% GMM   |       | GGDEF             |
| 573        | S573P (TCG-CCG)        | SNP   | Carbon limitation     | 3          | Biofilm                        | 1% GMM   |       | EAL               |
| 186        | R186C (CGC-TGC)        | SNP   | Carbon limitation     | 4          | Biofilm                        | 1% GMM   |       | PAS               |
| 355        | <b>Y355D (TAC-GAC)</b> | SNP   | Carbon limitation     | 4          | Biofilm                        | 1% GMM   |       | GGDEF             |
| 589        | F589L (TTC-TTG)        | SNP   | Carbon limitation     | 4          | Biofilm                        | 1% GMM   |       | EAL               |
| 403        | Q403* (CAG-TAG)        | Stop  | Carbon limitation     | 4          | Biofilm                        | 1% GMM   |       | linker            |
| 355        | <b>Y355C (TAC-TGC)</b> | SNP   | Carbon limitation     | 5          | Biofilm                        | 1% GMM   |       | GGDEF             |
| 570        | S570L (TCG-TTG)        | SNP   | Carbon limitation     | 5          | Biofilm                        | 1% GMM   |       | EAL               |
| DEL        | 95 gene deletion       | Indel | Carbon limitation     | 6          | Biofilm                        | 1% GMM   |       | All + <i>rpfF</i> |
| 355        | <b>Y355D (TAC-GAC)</b> | SNP   | Carbon limitation     | 6          | Biofilm                        | 1% GMM   |       | GGDEF             |
| 589        | F589L (TTC-TTG)        | SNP   | Carbon limitation     | 6          | Biofilm                        | 1% GMM   |       | EAL               |
| DEL        | 95 gene deletion       | Indel | Carbon limitation     | 7          | Biofilm                        | 1% GMM   |       | All + <i>rpfF</i> |
| 45         | L45P (CTG-CCG)         | SNP   | Carbon limitation     | 7          | Biofilm                        | 1% GMM   | FI    |                   |
| 280        | K280N (AAG-AAT)        | SNP   | Carbon limitation     | 7          | Biofilm                        | 1% GMM   | GGDEF |                   |
| 355        | <b>Y355D (TAC-GAC)</b> | SNP   | Carbon limitation     | 7          | Biofilm                        | 1% GMM   | GGDEF |                   |
| 355        | <b>Y355D (TAC-GAC)</b> | SNP   | Carbon limitation     | 8          | Biofilm                        | 1% GMM   | GGDEF |                   |

|            |                          |            |                   |    |         |           |                   |
|------------|--------------------------|------------|-------------------|----|---------|-----------|-------------------|
| 589        | F589L (TTC-TTG)          | SNP        | Carbon limitation | 8  | Biofilm | 1% GMM    | EAL               |
| DEL52-55   | coding (157-166/2004 nt) | Fram shift | Carbon limitation | 9  | Biofilm | 1% GMM    | All               |
| DEL        | 95 gene deletion         | Indel      | Carbon limitation | 9  | Biofilm | 1% GMM    | All + <i>rpfF</i> |
| 564        | D564V (GAT-GTT)          | SNP        | Carbon limitation | 9  | Biofilm | 1% GMM    | EAL               |
| DEL        | 95 gene deletion         | Indel      | Carbon limitation | 10 | Biofilm | 1% GMM    | All + <i>rpfF</i> |
| 172        | I172S (ATC-AGC)          | SNP        | Carbon limitation | 10 | Biofilm | 1% GMM    | PAS               |
| DEL        | 95 gene deletion         | Indel      | Carbon limitation | 11 | Biofilm | 1% GMM    | All + <i>rpfF</i> |
| DEL        | 95 gene deletion         | Indel      | Carbon limitation | 13 | Biofilm | 0.03% GMM | All + <i>rpfF</i> |
| 106        | A106P (GCG-CCG)          | SNP        | Carbon limitation | 13 | Biofilm | 0.03% GMM | linker            |
| 108        | G108R (GGG-AGG)          | SNP        | Carbon limitation | 13 | Biofilm | 0.03% GMM | linker            |
| DEL52-55   | coding (157-166/2004 nt) | Fram shift | Carbon limitation | 14 | Biofilm | 0.03% GMM | All               |
| DEL        | 95 gene deletion         | Indel      | Carbon limitation | 14 | Biofilm | 0.03% GMM | All + <i>rpfF</i> |
| DEL        | 2 gene deletion          | Indel      | Carbon limitation | 14 | Biofilm | 0.03% GMM | All + <i>rpfF</i> |
| 200        | R200H (CGC-CAC)          | SNP        | Carbon limitation | 14 | Biofilm | 0.03% GMM | PAS               |
| DEL        | 95 gene deletion         | Indel      | Carbon limitation | 15 | Biofilm | 0.03% GMM | All + <i>rpfF</i> |
| 394        | Y394* (TAT-TAA)          | Stop       | Carbon limitation | 15 | Biofilm | 0.03% GMM | GGDEF             |
| DEL        | 95 gene deletion         | Indel      | Carbon limitation | 16 | Biofilm | 0.03% GMM | All + <i>rpfF</i> |
| DEL116-124 | coding (349-372/2004 nt) | Indel      | Carbon limitation | 16 | Biofilm | 0.03% GMM | GGDEF+EAL         |
| 422        | E422* (GAG-TAG)          | Stop       | Carbon limitation | 16 | Biofilm | 0.03% GMM | EAL               |
| DEL        | 95 gene deletion         | Indel      | Carbon limitation | 17 | Biofilm | 0.03% GMM | All + <i>rpfF</i> |
| 203        | F203Y (TTC-TAC)          | SNP        | Carbon limitation | 17 | Biofilm | 0.03% GMM | PAS               |
| 253        | R253C (CGC-TGC)          | SNP        | Carbon limitation | 17 | Biofilm | 0.03% GMM | GGDEF             |
| 413        | T413K (ACG-AAG)          | SNP        | Carbon limitation | 17 | Biofilm | 0.03% GMM | EAL               |
| DEL        | 95 gene deletion         | Indel      | Carbon limitation | 18 | Biofilm | 0.03% GMM | All + <i>rpfF</i> |
| 105        | L105R (CTG-CGG)          | SNP        | Carbon limitation | 18 | Biofilm | 0.03% GMM | linker            |
| 158        | L158P (CTG-CCG)          | SNP        | Carbon limitation | 18 | Biofilm | 0.03% GMM | PAS               |

|            |                            |            |                   |    |                    |               |                     |                   |
|------------|----------------------------|------------|-------------------|----|--------------------|---------------|---------------------|-------------------|
| 218        | S218L (TCG-TTG)            | SNP        | Carbon limitation | 18 | Biofilm            | 0.03% GMM     |                     | PAS               |
| 537        | S537R (AGC-AGG)            | SNP        | Carbon limitation | 18 | Biofilm            | 0.03% GMM     |                     | EAL               |
| DEL478-488 | coding (1453-1464/2004 nt) | Indel      | Carbon limitation | 24 | Planktonic         | 1% GMM        |                     | EAL               |
| DEL        | 95 gene deletion           | Indel      | Carbon limitation | 25 | Planktonic         | 0.03% GMM     |                     | All + <i>rpfF</i> |
| DEL        | 95 gene deletion           | Indel      | Carbon limitation | 26 | Planktonic         | 0.03% GMM     |                     | All + <i>rpfF</i> |
| 589        | F589L (TTC-TTG)            | SNP        | Carbon limitation | 26 | Planktonic         | 0.03% GMM     |                     | EAL               |
| DEL        | 95 gene deletion           | Indel      | Carbon limitation | 27 | Planktonic         | 0.03% GMM     |                     | All + <i>rpfF</i> |
| 409        | M409R (ATG-AGG)            | SNP        | Carbon limitation | 27 | Planktonic         | 0.03% GMM     |                     | linker            |
| DEL        | 95 gene deletion           | Indel      | Carbon limitation | 30 | Planktonic         | 0.03% GMM     |                     | All + <i>rpfF</i> |
| 589        | F589L (TTC-TTG)            | SNP        | Carbon limitation | 30 | Planktonic         | 0.03% GMM     |                     | EAL               |
| DEL        | 95 gene deletion           | Indel      | LTE               | B1 | Biofilm            | 3% GMM        | (3)                 | All + <i>rpfF</i> |
| 106        | A106P                      | SNP        | LTE               | B1 | Biofilm            | 3% GMM        | linker              |                   |
| 258        | I258I                      | SNP        | LTE               | B1 | Biofilm            | 3% GMM        | GGDEF               |                   |
| 355        | <b>Y355D</b>               | SNP        | LTE               | B1 | Biofilm            | 3% GMM        | GGDEF               |                   |
| 32         | L32P                       | SNP        | LTE               | B2 | Biofilm            | 3% GMM        | (3) and Unpublished | FI                |
| 90         | G90S                       | SNP        | LTE               | B2 | Biofilm            | 3% GMM        | FI                  |                   |
| 244        | L244P                      | SNP        | LTE               | B2 | Biofilm            | 3% GMM        | GGDEF               |                   |
| 589        | F589Y                      | SNP        | LTE               | B4 | Biofilm            | 3% GMM        | EAL                 |                   |
| 606        | V606G                      | SNP        | LTE               | B4 | Biofilm            | 3% GMM        | EAL                 |                   |
| 570        | S570L                      | SNP        | LTE               | B5 | Biofilm            | 3% GMM        | EAL                 |                   |
| 641        | G641R                      | SNP        | LTE               | P2 | Planktonic         | 3% GMM        | EAL                 |                   |
| 203        | F203S (TTC→TCC)            | SNP        | Onion             |    | Planktonic         | Onion extract | (4) and Unpublished | PAS               |
| 97         | coding (290/2004 nt)       | Frameshift | Fluctuating       | 1  | Biofilm/Planktonic | 3% GMM        | (5)                 | linker            |
| 104        | D104G (GAC-GGC)            | SNP        | Fluctuating       | 1  | Biofilm/Planktonic | 3% GMM        | linker              |                   |
| 377        | R377H (CGC-CAC)            | SNP        | Fluctuating       | 2  | Biofilm/Planktonic | 3% GMM        | GGDEF               |                   |
| 589        | F589V (TTC-GTC)            | SNP        | Fluctuating       | 3  | Biofilm/Planktonic | 3% GMM        | EAL                 |                   |



Table S2: List of bacterial strains used in the study

| Strain                 | Genotype                                                                 | Phenotype                           | Reference                          |
|------------------------|--------------------------------------------------------------------------|-------------------------------------|------------------------------------|
| <i>B. cenocepacia</i>  |                                                                          |                                     |                                    |
| WT                     | HI2424                                                                   |                                     | (6)                                |
| Y355D                  | SNP in GGDEF domain of <i>rpfR</i><br>(Bcen2424_3554)                    | High c-di-GMP,<br>increased biofilm | This study                         |
| A106P                  | SNP in the linker region<br>between FI and PAS domains<br>of <i>rpfR</i> | Increased biofilm                   | This study                         |
| $\Delta rpfRF+93$      | Deletion of <i>rpfR</i> , <i>rpfF</i> and 93<br>other genes downstream   | Increased biofilm                   | Isolated from population B1<br>(3) |
| $\Delta rpfF$          | Deletion of <i>rpfF</i><br>(Bcen2424_3555)                               | No BDSF production                  | This study                         |
| $\Delta rpfR$          | Deletion of <i>rpfR</i>                                                  | Increased biofilm                   | This study                         |
| $\Delta rpfFR$         | Deletion of <i>rpfF</i> and <i>rpfR</i>                                  | Increased biofilm                   | This study                         |
| GGDAF                  | SNP in GGDEF domain of <i>rpfR</i>                                       | Increased biofilm                   | This study                         |
| AAL                    | SNP in EAL domain of <i>rpfR</i>                                         | Increased biofilm                   | This study                         |
| FI                     | Deletion of FI domain in <i>rpfR</i>                                     | Increased biofilm                   | (6)                                |
| Y355D-GGDAF            | SNPs in GGDEF domain of<br><i>rpfR</i>                                   | Decreased c-di-<br>GMP              | This study                         |
| WT lac+                | Tn7:: <i>lacZ</i>                                                        |                                     | (4)                                |
| Y355D lac+             | Tn7:: <i>lacZ</i>                                                        |                                     | This study                         |
| $\Delta rpfRF+93$ lac+ | Tn7:: <i>lacZ</i>                                                        |                                     | This study                         |
| $\Delta rpfR$ lac+     | Tn7:: <i>lacZ</i>                                                        |                                     | This study                         |
| WT YFP                 | pSPY                                                                     |                                     | This study                         |
| WT RFP                 | pSPR                                                                     |                                     | This study                         |
| Y355D YFP              | pSPY                                                                     |                                     | This study                         |
| Y355D RFP              | pSPR                                                                     |                                     | This study                         |
| A106P YFP              | pSPY                                                                     |                                     | This study                         |
| A106P RFP              | pSPR                                                                     |                                     | This study                         |
| $\Delta rpfRF+93$ YFP  | pSPY                                                                     |                                     | This study                         |
| $\Delta rpfRF+93$ RFP  | pSPR                                                                     |                                     | This study                         |
| $\Delta rpfF$ YFP      | pSPY                                                                     |                                     | This study                         |



|                             |           |  |            |
|-----------------------------|-----------|--|------------|
| $\Delta rpfF$ RFP           | pSPR      |  | This study |
| $\Delta rpfR$ YFP           | pSPY      |  | This study |
| $\Delta rpfR$ RFP           | pSPR      |  | This study |
| <i>E. coli</i> DH5 $\alpha$ | pSPY      |  | (7)        |
| <i>E. coli</i> DH5 $\alpha$ | pSPR      |  |            |
| <i>E. coli</i> DH5 $\alpha$ | Tn7::lacZ |  |            |
| <i>E. coli</i> DH5 $\alpha$ | pTnHelper |  | (8)        |

### Supplementary figures

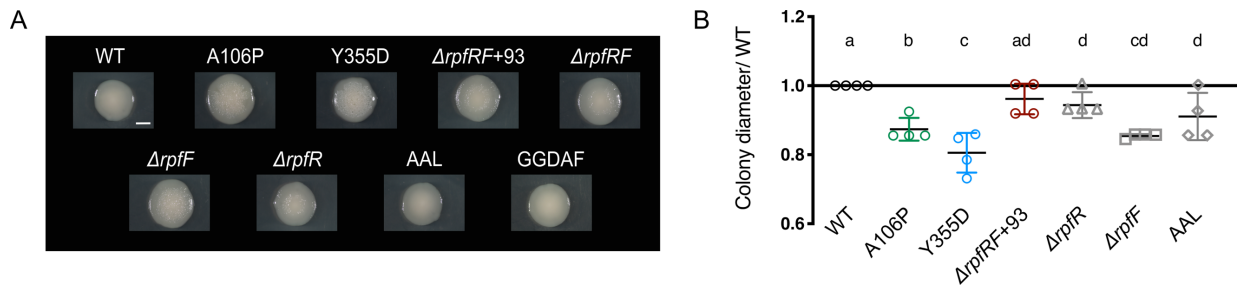

**Fig. S1. Phenotypic characteristics of *rpfR* mutant colonies.** (A) Isolated colonies of *rpfR* mutants (scale bar= 2mm). Spot colonies shown in Fig 1 do not enhance the central studded structures otherwise often seen in isolated colonies on half-strength Tryptic Soy broth. Engineered mutants inactivating the catalytic domains (AAL and GGDEF) have a smooth phenotype. (B) Relative motility is determined by the colony diameter of the mutant divided by that of the wild type after 18 hours of growth in soft agar plates (different letters indicate significant differences between mutants following posthoc Tukey tests).

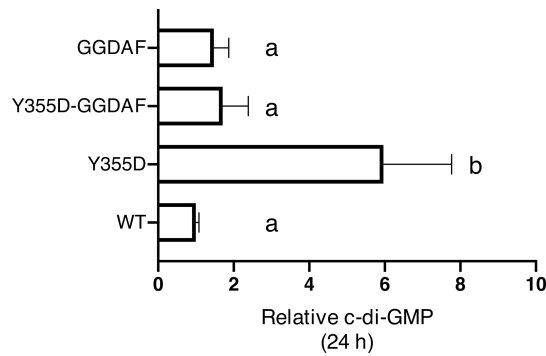

**Fig. S2. Activation of the GGDEF domain in the Y355D mutant contributes to the enhanced c-di-GMP levels and fitness gain.** The c-di-GMP levels in *rpfR* GGDAF mutant inactivating the diguanylate cyclase function are similar to that in WT, indicating that the GGDEF domain in WT is probably inactive. Interestingly, mutation Y355D seems to activate the GGDEF domain suggested by the high levels of c-di-GMP and subsequent lower levels in the Y355D GGDAF mutant.

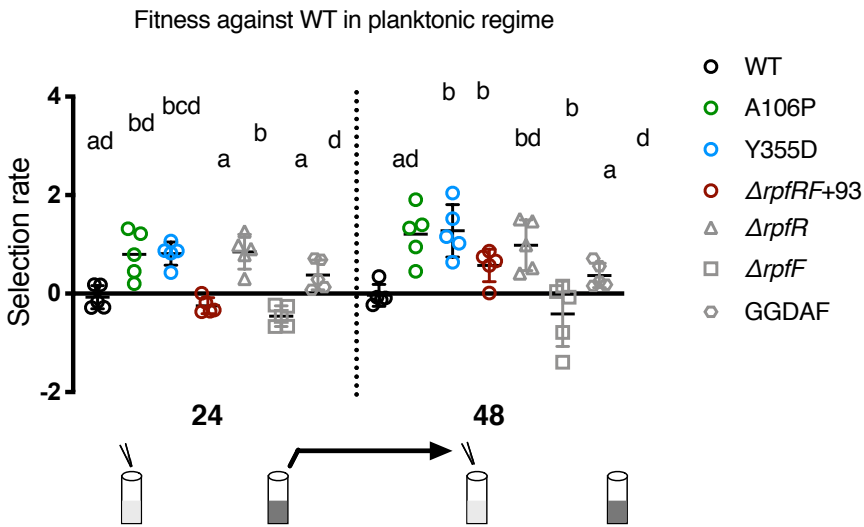

Fig. S3. **Relative fitness against WT at 24 and 48 hs in planktonic growth conditions.** Most mutants exhibit higher fitness in planktonic conditions (except,  $\Delta rpfRF+93$  and  $\Delta rpfF$ ). Different letters are used to indicate significant differences between the mutants by post hoc testing following ANOVA.

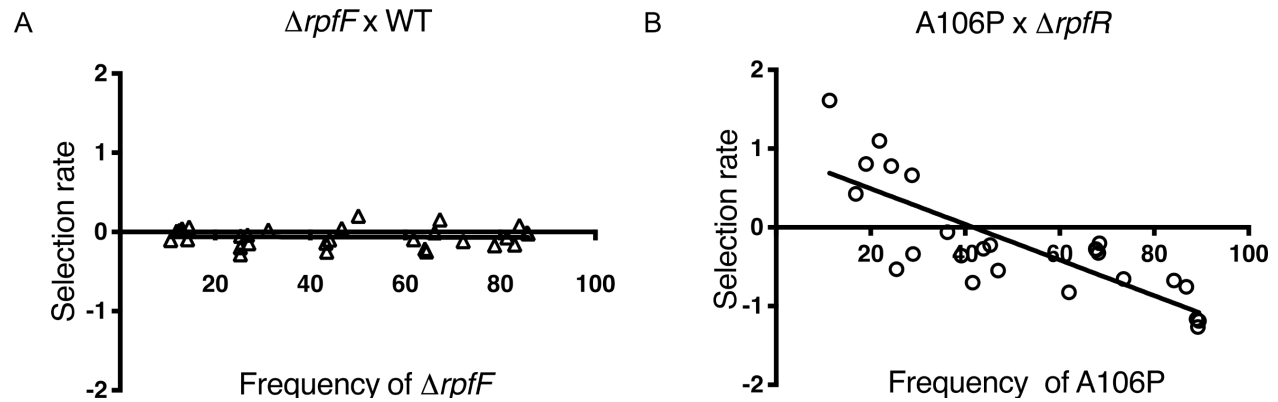

Fig. S4. **Tests of frequency-dependent interactions.** (A)  $\Delta rpfF$  versus WT has no fitness advantage against wild type even when present at different frequencies, despite higher biofilm production when grown alone. (B) A106P versus  $\Delta rpfR$ , where A106P shows negative frequency-dependent selection against  $\Delta rpfR$ , consistent with its insensitivity to BDSF production. Regression analyses produced the following functions:  $y = -0.0001073 \cdot x - 0.05973$ ,  $r^2 = 0.0005545$  (A) and  $y = -0.02265 \cdot x + 0.945$ ,  $r^2 = 0.6421$  (B).

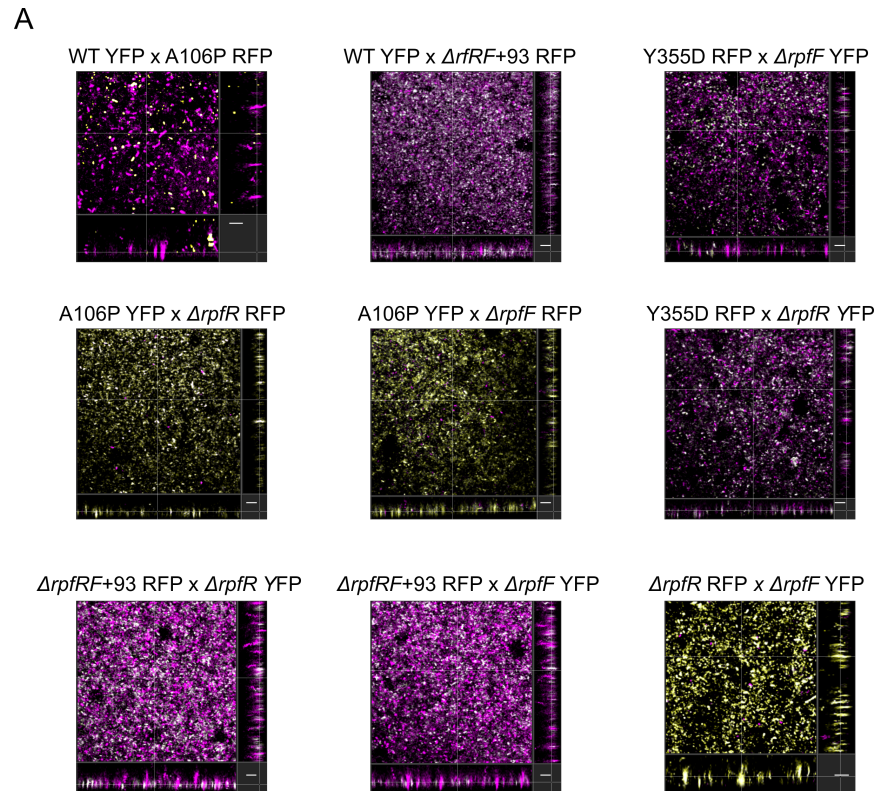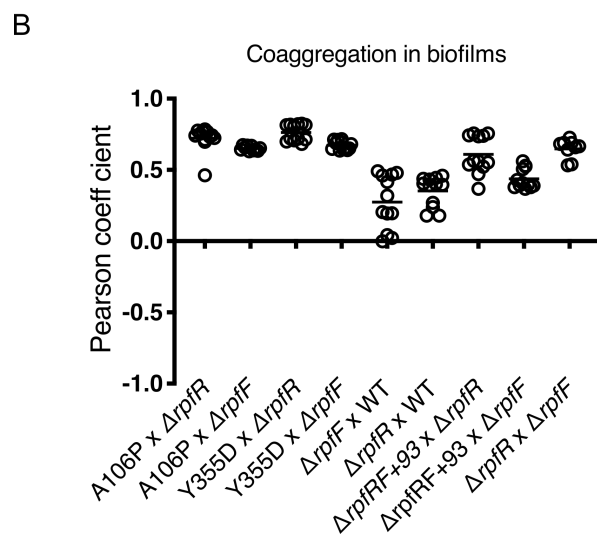

**Fig. S5. Microscopic biofilm structures and extent of coaggregation.** (A) WT and mutants have characteristic structural differences: WT shows isolated small clusters while A106P and Y355D both exhibit large aggregates in biofilm. Note that both  $\Delta rpfR$  and  $\Delta rpfF$  form small clusters amidst larger aggregates produced by A106P and Y355D, implying the interaction between genotypes and formation of a mixed biofilm structure. The biofilms of  $\Delta rpfR+93$  with  $\Delta rpfR$  and  $\Delta rpfF$  show small clusters with uniform coverage demonstrating mixed biofilm.  $\Delta rpfR$

and  $\Delta rpfF$  together form large aggregates. Coaggregation in biofilms is represented as white spots and RFP labeled cells are false-colored in magenta for ease of viewing (scale= 10  $\mu\text{m}$ ). (B) Coaggregation in biofilms is determined by the Pearson Coefficient (-1= negative correlation, 0= no correlation and 1= positive correlation), where positive values between 0 and 1 indicate the extent of overlap between two channels.

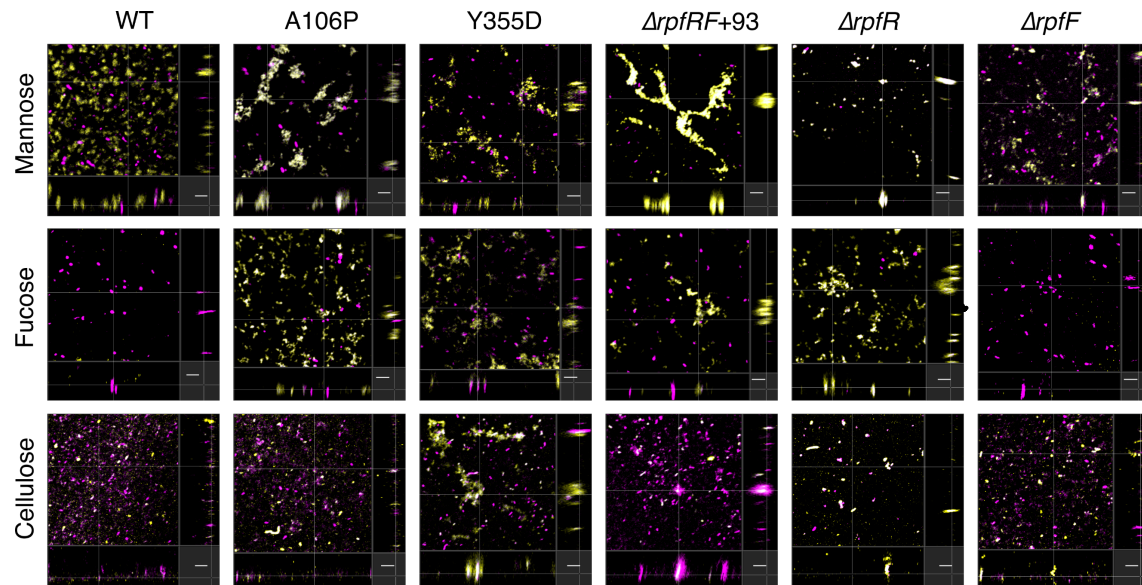

Fig. S6. **Lectin-based labeling of matrix polysaccharides in biofilms.** Fluorescently tagged lectins bind mannose and fucose, and calcofluor white stains cellulose in biofilms. Labels are shown in yellow, while RFP-labeled cells are false-colored in magenta (scale= 10  $\mu\text{m}$ ).

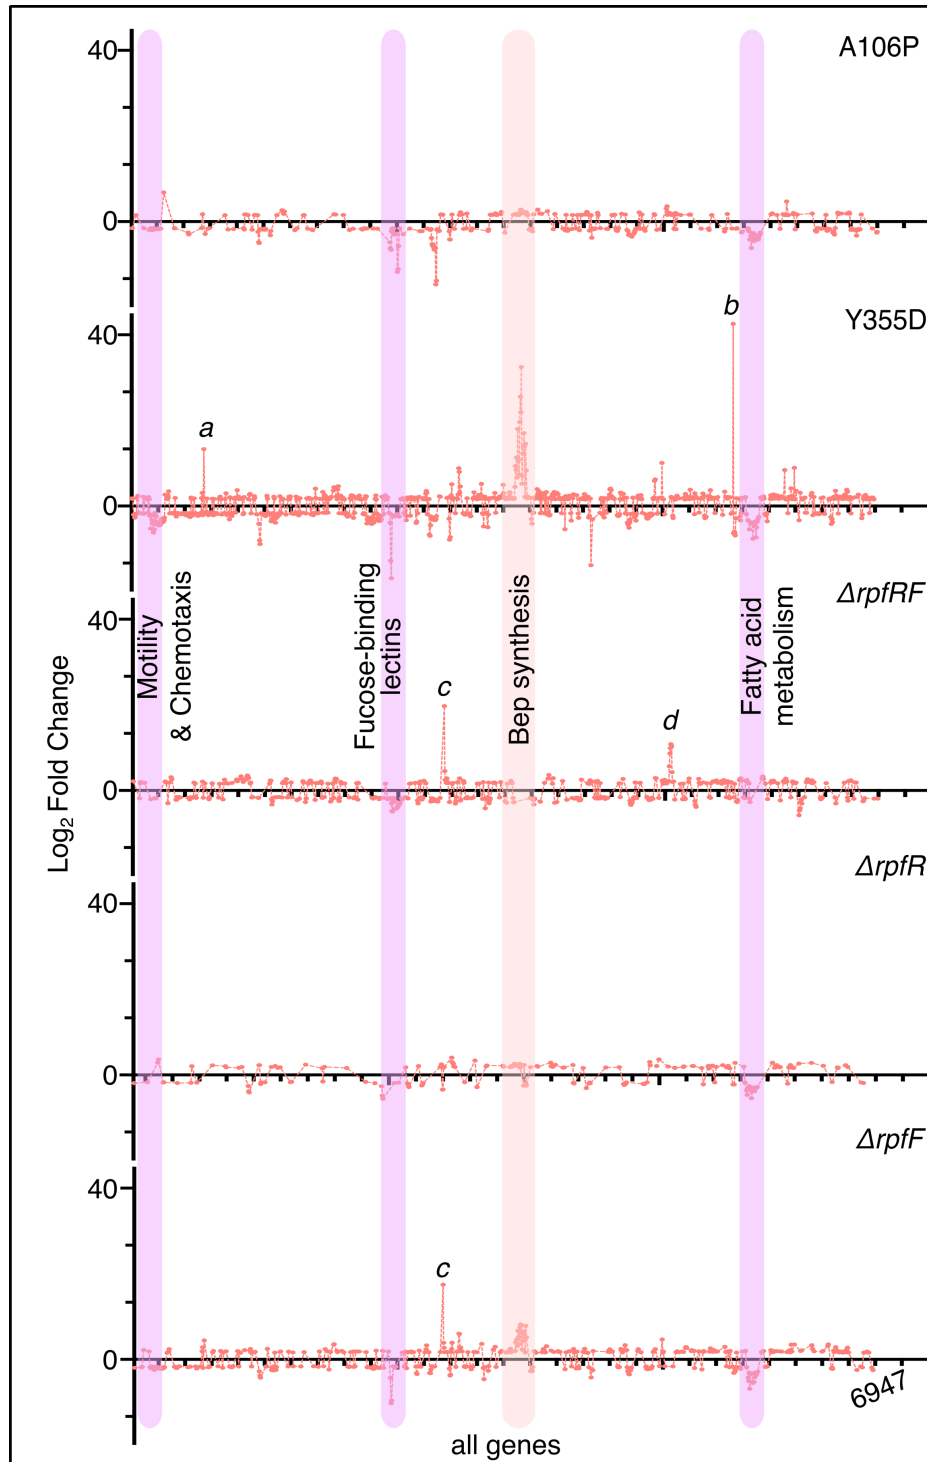

Fig. S7. **Spectral representation of the mean fold changes in expression.** Mean fold-changes in gene expression compared to wild type are calculated from the three biological replicates of each mutant (q value < 0.05). The highlighted (purple: downregulated, orange: upregulated) gene clusters display parallel shift in 4 or more mutants (highest in *rpfR* Y355D). Specific genes showing significant upregulation or downregulation are marked with letters: a: outer membrane

autotransporter, b: Flp/Fap pilin component, c: Bcen2424\_3556 (gene adjacent to *rpfF*, function unknown) and d: GTP cyclohydrolase. The raw data is submitted to NCBI BioProject (Accession number: PRJNA607303).

1. I. N. Silva, *et al.*, Long-Term Evolution of *Burkholderia multivorans* during a Chronic Cystic Fibrosis Infection Reveals Shifting Forces of Selection. *mSystems* **1** (2016).
2. C. B. Turner, C. W. Marshall, V. S. Cooper, Parallel genetic adaptation across environments differing in mode of growth or resource availability. *Evol Lett* **2**, 355–367 (2018).
3. C. C. Traverse, L. M. Mayo-Smith, S. R. Poltak, V. S. Cooper, Tangled bank of experimentally evolved *Burkholderia* biofilms reflects selection during chronic infections. *Proc Natl Acad Sci U S A* **110**, E250–E259 (2013).
4. C. N. Ellis, V. S. Cooper, Experimental adaptation of *Burkholderia cenocepacia* to onion medium reduces host range. *Applied and environmental microbiology* **76**, 2387–2396 (2010).
5. C. B. Turner, S. W. Buskirk, K. B. Harris, V. S. Cooper, Negative frequency-dependent selection maintains coexisting genotypes during fluctuating selection. *Mol. Ecol.* **29**, 138–148 (2020).
6. E. J. Waldron, *et al.*, Structural basis of DSF recognition by its receptor RpfR and its regulatory interaction with the DSF synthase RpfF. *PLoS Biol* **17** (2019).
7. S. R. Poltak, V. S. Cooper, Ecological succession in long-term experimentally evolved biofilms produces synergistic communities. *ISME J* **5**, 369–378 (2011).
8. T. T. Hoang, R. R. Karkhoff-Schweizer, A. J. Kutchma, H. P. Schweizer, A broad-host-range Flp-FRT recombination system for site-specific excision of chromosomally-located DNA sequences: application for isolation of unmarked *Pseudomonas aeruginosa* mutants. *Gene* **212**, 77–86 (1998).
